# Functional diversity among sensory neurons from efficient coding principles

Julijana Gjorgjieva<sup>1</sup>, Markus Meister<sup>2</sup>, Haim Sompolinsky<sup>3,4</sup>

**1** Max Planck Institute for Brain Research, Frankfurt, Germany

**2** Division of Biology, California Institute of Technology, Pasadena, CA, USA

**3** Center for Brain Science, Harvard University, Cambridge, MA, USA

**4** The Edmond and Lily Safra Center for Brain Sciences, Hebrew University, Jerusalem, Israel

\* gjorgjieva@brain.mpg.de

## 1 **Abstract**

2 In many sensory systems the neural signal is coded by the coordinated response of heterogeneous populations  
3 of neurons. What computational benefit does this diversity confer on information processing? We derive an  
4 efficient coding framework assuming that neurons have evolved to communicate signals optimally given natural  
5 stimulus statistics and metabolic constraints. Incorporating nonlinearities and realistic noise, we study optimal  
6 population coding of the same sensory variable using two measures: maximizing the mutual information between  
7 stimuli and responses, and minimizing the error incurred by the optimal linear decoder of responses. Our theory  
8 is applied to a commonly observed splitting of sensory neurons into ON and OFF that signal stimulus increases  
9 or decreases, and to populations of monotonically increasing responses of the same type, ON. Depending on  
10 the optimality measure, we make different predictions about how to optimally split a population into ON and  
11 OFF, and how to allocate the firing thresholds of individual neurons given realistic stimulus distributions and  
12 noise, which accord with certain biases observed experimentally.

## 13 **Introduction**

14 The efficient coding hypothesis states that sensory systems have evolved to optimally transmit information  
15 about the natural world given limitations on their biophysical components and constraints on energy use [1].  
16 This theory has been applied successfully to explain the structure of neuronal receptive fields in the mammalian  
17 retina [2,3] and fly lamina [4,5] based on the statistics of natural scenes. Similar arguments have been made to  
18 explain why early sensory pathways often split into parallel channels that represent different stimulus variables,  
19 for example different auditory waveforms [6], or local visual patterns [7]. Even neurons that encode the same  
20 sensory feature often split further into distinct types. One such commonly encountered diversification is into ON  
21 and OFF types: ON cells fire when the stimulus increases and OFF cells when it decreases. This basic ON-OFF  
22 dichotomy is found in many modalities, including vertebrate vision [8], invertebrate vision [9], thermosensation  
23 [10], and chemosensation [11]. Furthermore, among the neurons that encode the same sensory variable with the  
24 same sign, one often encounters distinct types that have different response thresholds, for example, among touch  
25 receptors [12] and electroreceptors [13]. The same principle seems to apply several synapses downstream from the  
26 receptors [14], and even in the organization of the motor periphery, where motor neurons that activate the same  
27 muscle have a broad range of response thresholds [15]. In the present article we consider this sensory response  
28 diversification among neurons that represent the same variable and explore whether it can be understood based  
29 on a nonlinear version of efficient population coding.

30 One reason why the ON and OFF pathways have evolved may be to optimize information about both  
31 increments and decrements in stimulus intensity by providing excitatory signals for both [16]. For instance,  
32 if there were only one ON neuron, then such a cell would need high baseline firing rate to encode stimulus  
33 decrements, which can be very costly. We, and others have previously addressed the benefits for having ON and  
34 OFF cells in a small population of just two cells [17–19]. However, it remains unclear how a population of many  
35 neurons could resolve this issue by tuning their thresholds so that they jointly code for the stimulus. Since ON  
36 and OFF neurons often exhibit a broad distribution of firing thresholds [12–15], an important question is thus,

37 what distribution of thresholds yields the most efficient coding. Here we study optimal information transmission  
38 in sensory populations comprised of different mixtures of ON and OFF neurons, including purely homogeneous  
39 populations with neurons of only one type, e.g. ON, that code for a common stimulus variable by diversifying  
40 their thresholds.

41 Traditionally, efficient population coding has either optimized linear features in the presence of noise [2, 3,  
42 20, 21], or nonlinear processing in the limit of no noise or infinitely large populations [22–25]. We simultaneously  
43 incorporate neuronal nonlinearities and realistic noise at the spiking output, which have important consequences  
44 in finite populations of neurons, as encountered biologically. We develop the problem parametrically in the  
45 neuronal noise and the distribution of stimuli that the cells encode, allowing us to make general predictions  
46 applicable to different sensory systems.

47 What quantity might neural populations optimize? We consider two alternative measures of optimal coding  
48 that are in common use [22, 26–30]: first we maximize the mutual information between stimulus and response  
49 without any assumptions about how this information should be decoded, and second we optimize the estimate  
50 of the stimulus obtained by a linear decoder of the response. The two criteria lead to different predictions both  
51 on the optimal ON/OFF ratio and the distribution of optimal thresholds. When constraining the maximal  
52 firing rate of each cell, we find that counter to our expectations the mutual information is identical for any  
53 mixture of ON and OFF cells once the thresholds of all cells are optimized. This result is independent of the  
54 shape of the stimulus distribution and the level of neuronal noise. However, the total mean spike count is the  
55 lowest for the population with equal numbers of ON and OFF cells, making this arrangement optimal in terms  
56 of bits per spike. Optimizing the linear decoder requires determining not only the cells’ thresholds, but also  
57 the decoding weights in order to minimize the mean square error between the stimulus and its estimate. Under  
58 this criterion, the optimal ON/OFF mixture and cells’ thresholds depend on the asymmetries in the stimulus  
59 distribution and the noise level, and can account for certain biases observed experimentally in different sensory  
60 systems. We also make distinct predictions for the optimal distribution of thresholds under the two optimality  
61 measures, noise level and stimulus distributions, providing insight into the diverse coding strategies of these  
62 populations across different sensory modalities and species where these differences are encountered.

## 63 Results

### 64 Population coding model

65 We develop a theoretical framework to derive the coding efficiency and response properties of a population of  
66 sensory neurons representing a common stimulus (Fig. 1A). We specifically consider populations with responses  
67 of opposite polarity, ON and OFF, which increase or decrease their response as a function of the common sensory  
68 variable; thus, our theory applies to any sensory system where ON and OFF pathways have been observed, for  
69 example, heat-activated and cold-activated ion channels in thermosensation [31, 32], mechanosensory neurons  
70 [33, 34], or retinal ganglion cells which code for the same spatial location and visual feature with different  
71 thresholds [18]. As a special case, we consider populations of neurons with a single polarity, which increase  
72 their response as a function of the common sensory variable, for example, olfactory receptor neurons that code  
73 for the same odor at different concentrations [35–37]. Each model neuron encodes information about a common  
74 scalar stimulus through the spike count observed during a short coding window. The duration of this coding  
75 window,  $T$ , is chosen based on the observed dynamics of neuronal responses, which is typically in the range of  
76 10-50 ms [28, 38]. Neuronal spike counts are stochastic and their mean is modulated by the stimulus through a  
77 discrete response function with a finite number of responses. Discretization in neural circuits occurs on many  
78 levels [39]; for example, previous experimental studies have found that sensory neurons use discrete firing rate  
79 levels to represent continuous stimuli [4, 27, 40]. Furthermore, theoretical work has shown that the optimal  
80 neuronal response functions are discrete under different measures of efficiency [27, 41–43].

81 The best way to discretize a neural signal depends on many factors, including noise, stimulus statistics  
82 and biophysical constraints [39]. Under the constraint of short coding windows encountered in many sensory  
83 areas, optimizing a single response function results in a discretization with two response levels, i.e. a binary  
84 response function [27, 28, 41–43]. Binary response functions also offer a reasonable approximation of neural  
85 behavior in several systems [28, 44, 45]. Therefore, we assumed that ON (OFF) neurons fire Poisson spikes

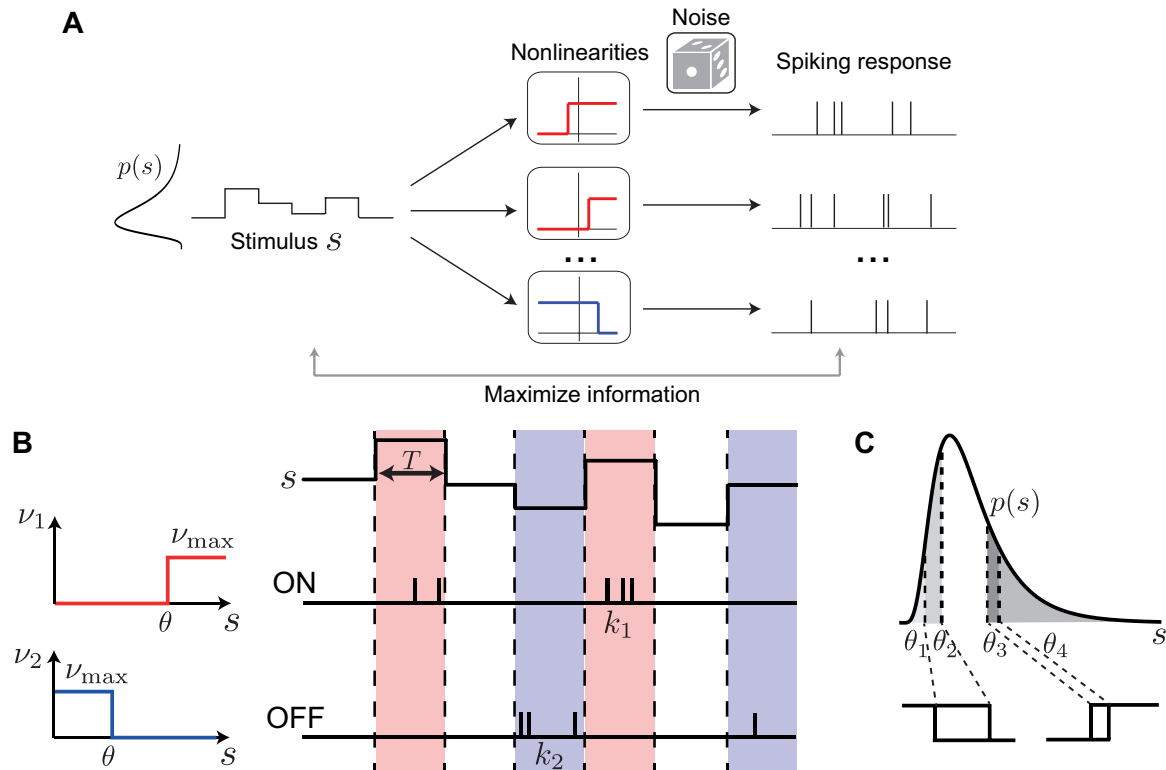

**Figure 1. Neuron model and population coding framework.** **A.** Framework schematic. A stimulus  $s$  from a probability distribution  $p(s)$  is encoded by the spiking responses of a population of ON (red) and OFF (blue) cells. We optimize the cells' nonlinearities by maximizing the mutual information between stimulus and spiking response. **B.** Each cell is described by a binary response nonlinearity  $\nu$  with a threshold  $\theta$  and maximal firing rate  $\nu_{\max}$ . During a coding window of fixed duration  $T$  the stimulus is constant and the spike count  $k$  is drawn from a Poisson distribution with a mean rate  $\nu$ . **C.** When measuring coding efficiency using the mutual information between stimulus and spike count response, the neurons' thresholds can be interpreted as quantiles of the original stimulus distribution, thus mapping an arbitrary stimulus distribution  $p(s)$  into a uniform distribution (four thresholds shown).

86 with an average mean count  $\nu_{\max}$  whenever the stimulus intensity is above (below) their threshold  $\theta_i$ , and zero  
 87 otherwise, i.e.  $\nu_i(s) = \nu_{\max}\Theta(s - \theta_i)$  for ON neurons and  $\nu_i(s) = \nu_{\max}\Theta(\theta_i - s)$  for OFF neurons (Fig. 1B),  
 88 where  $\Theta$  is the Heaviside function.

### 89 Maximal mutual information for mixtures of ON and OFF neurons

90 What should be the number of ON vs. OFF cells and the distribution of their firing thresholds in a population  
 91 of neurons that optimally represent a given stimulus? To answer these questions, we first maximize the Shannon  
 92 mutual information between stimulus and population response, in search of a simple efficient coding principle  
 93 that could explain ON-OFF splitting and, more generally, threshold diversification. We perform the optimization  
 94 while constraining the expected spike count  $R = \nu_{\max}T$  for each cell. Biophysically, such a constraint on the  
 95 maximal firing rate arises naturally from refractoriness of the spike-generating membrane. We have analytically  
 96 proven the following theorem (see Methods):

97 **Equal Coding Theorem:** For a population of any number  $N$  of ON and OFF Poisson neurons coding a  
 98 one-dimensional stimulus in a fixed time window  $T$  by binary rate functions with maximal firing rate  $\nu_{\max}$ , the  
 99 mutual information is identical for all ON/OFF mixtures when the thresholds are optimized, for all  $N$ ,  $\nu_{\max}$   
 100 and stimulus distributions.

101 Specifically, the maximal information is achieved in the case when the ON and OFF cells do not overlap,

102 so that all ON thresholds are bigger than all OFF thresholds. For example, consider a mixed population of  
 103 ON and OFF cells. To calculate the information conveyed by this entire population, we imagine first observing  
 104 only the ON cells, and in a second step the remaining OFF cells. If one of the ON cells fired a spike, we  
 105 know the stimulus is in that cell’s response range, and therefore we do not learn additional information from  
 106 observing the OFF cells. If none of the ON cells fired, we gain additional information from observing the OFF  
 107 cells. One can make the same argument if the remaining cells are all ON cells, or indeed any other mixture.  
 108 Careful consideration shows that the maximal information gained from that remaining cell population is the  
 109 same whether they are ON cells or OFF cells (see Methods and S1 Text). Hence, the homogeneous and any  
 110 mixed ON-OFF population achieve the same maximal information.

111 The value of this maximal information depends on the expected spike count,  $R = \nu_{\max}T$ . We introduce the  
 112 parameter  $q = e^{-R}$ , which ranges from  $q = 0$  in the noiseless limit of high firing rate, and  $q = 1$  in the high  
 113 noise limit of low firing rate. We show that for any ON-OFF mixture (including the homogeneous with only  
 114 ON cells), the maximal information achieved with optimized thresholds is (Fig. 2A, see Methods)

$$I = \log \left( 1 + N(1 - q)q^{q/(1-q)} \right). \quad (1)$$

115 We further ensured that the conclusion of equal coding holds in a population of two cells independent of the  
 116 Poisson noise model we assumed, which has zero noise when the the firing rate of a neuron is zero. Specifically,  
 117 we investigated information transmission introducing a spontaneous firing rate under the same Poisson model,  
 118 as well as empirically measured sub-Poisson noise from salamander retinal ganglion cells [17, 28] (see S1 Text).

119 The above equation 1 allows us to exactly compute the maximal information that would be reached by a  
 120 population of neurons as a function of the number of neurons  $N$  and the level of noise  $q$  assuming optimality,  
 121 without resorting to expensive numerical calculations [46]. Even if real biological systems do not perform  
 122 optimally, this quantity could be used as an upper bound for the largest possible information that the system  
 123 could transmit under the appropriate constraints. In the noiseless limit,  $R \rightarrow \infty$  (i.e.  $q = 0$ ), where the neurons  
 124 are deterministic,  $I$  reaches its upper bound  $I = \log(N + 1)$ . The effect of noise is most prominent when  $R$   
 125 is of order  $1/N$ , so that the total spike count  $RN$  is of order 1, implying that the signal-to-noise of the entire  
 126 population is of order 1. We call this the **high noise regime**, and here we obtain  $I \rightarrow \log(RN/e + 1)$ , where  
 127  $e$  denotes exp(1).

## 128 Optimal distribution of thresholds

129 We next asked what distribution of thresholds in the population of ON and OFF cells achieves this maximal  
 130 mutual information. In the case of a discrete rate function, we can replace  $\theta_i$  by the corresponding cumulative  
 131 threshold (fraction of stimuli below threshold), which essentially maps the stimulus distribution into a uniform  
 132 distribution from 0 to 1 (Fig. 1C). Since the stimulus dependence enters only through these values, the maximal  
 133 mutual information is independent of the stimulus distribution  $p(s)$ , provided that the stimulus cumulative  
 134 distribution is continuous. Instead, the information depends on the areas of  $p(s)$  between consecutive thresholds.  
 135 It is therefore useful to define the optimal threshold intervals  $p_i = \int_{\theta_i}^{\theta_{i+1}} ds p(s)$  where the neurons’ thresholds  
 136 are ordered  $\theta_1 \leq \dots \leq \theta_N$  (and we define the special  $\theta_0 = -\infty$  and  $\theta_{N+1} = \infty$ ). We find a surprisingly simple  
 137 structure for the optimal  $p_i$  (Fig. 2B,C). The optimal thresholds divide stimulus space into intervals of equal  
 138 area, which depend on the noise level,  $q$ ,

$$p_i = p = \int_{\theta_i}^{\theta_{i+1}} ds p(s) = \frac{1 - q}{q^{-q/(1-q)} + N(1 - q)} \quad (2)$$

139 for all  $i$ , *except* for the two ‘edge’ intervals,

$$p_{\text{edge}} = \int_{-\infty}^{\theta_1} ds p(s) = \int_{\theta_N}^{\infty} ds p(s) = \frac{p}{1 - q}, \quad (3)$$

140 and the ‘silent’ interval that separates the ON and OFF thresholds,  $p_0 = 1 - (N - 2)p - 2p_{\text{edge}}$  (see Methods).  
 141 Note that for the homogeneous population,  $p'_0 = 1 - (N - 1)p - p_{\text{edge}}$ . We call this optimal threshold structure  
 142 the **infomax** solution.

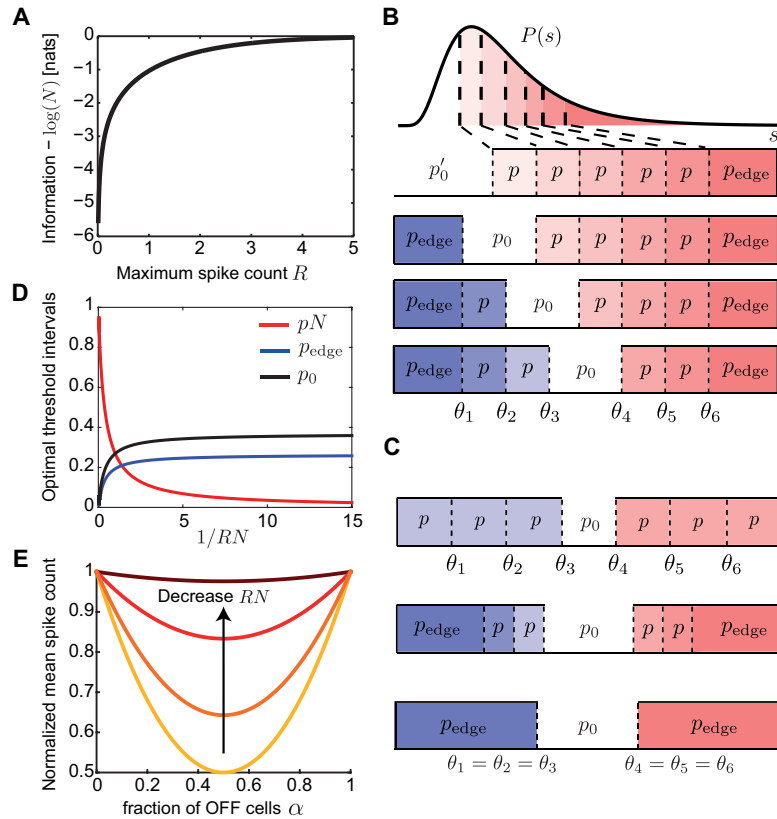

**Figure 2. Mutual information when constraining the expected spike count.** **A.** The mutual information between stimulus and response for any mixture of  $N$  ON and OFF cells is identical when constraining the expected spike count,  $R$ . **B.** The optimal threshold intervals for all possible mixtures of ON (red) and OFF (blue) cells in a population of  $N = 6$  cells that achieve the same mutual information about a stimulus from an arbitrary distribution  $p(s)$ . **C.** The optimal threshold intervals for the equal ON-OFF mixture in a population of  $N = 6$  cells and different values of  $R$  (equivalently, noise); see also D. Top: low noise ( $RN \rightarrow \infty$ ); middle: intermediate noise ( $RN = 1$ ); bottom: high noise ( $RN \rightarrow 0$ ). **D.** The optimal threshold intervals as a function of  $1/RN$ . **E.** The mean spike count required to transmit the same information (see A) by populations with a different fraction of OFF cells ( $\alpha$ ), normalized by the mean spike count of the homogeneous population with  $\alpha = 0$ . The different curves denote  $RN = \{0.1, 1, 5, 100\}$ .

143 We consider several limiting cases: first, a large population  $N \gg 1$  and maximal firing rate per neuron  $R$ ,  
 144 which is much larger than  $1/N$ , i.e.  $1 - q = \mathcal{O}(1)$ . We call this the **large population regime**. In this regime,  
 145  $p_{\text{edge}} = p = p_0 = 1/(N + 1)$ , so the  $N$  thresholds divide stimulus space into  $N + 1$  equal intervals (Fig. 2C  
 146 top, D). In this large population regime, we can rewrite the optimal thresholds as a continuous function of  
 147 cumulative stimulus space; we replace  $\theta_i$  with  $\theta(x)$ , where  $x = i/N$  is the threshold index between 0 and 1.  
 148 Then the optimal thresholds equalize the area under the stimulus density,  $x(\theta) = \int_{-\infty}^{\theta} p(\theta') d\theta'$ . Therefore,  
 149 the population of cells achieves ‘histogram equalization’ in that it uses all the available response symbols at  
 150 equal frequency, as has been shown before for a single cell with many discrete signaling levels in the limit of no  
 151 noise [4, 47].

152 In contrast, when the noise is high so that  $RN \rightarrow 0$ , the system performs redundant coding so that each  
 153  $p_i$  is infinitesimally small and the only two substantial threshold intervals are the edge intervals  $p_{\text{edge}} = 1/e$ ,  
 154 and the silent interval,  $p_0 = 1 - 2/e$ , which separates the ON and OFF thresholds (Fig. 2C bottom, D).  
 155 This  $p_0$  is the only non-noisy response state where the firing rate of each cell is zero. This implies that the  
 156 optimal solution is to place all ON thresholds at roughly the same value, and similarly all OFF thresholds at  
 157 another value (Fig. 2C bottom). This solution maximizes redundancy across neurons in the interest of noise

158 reduction [2, 48, 49], consistent with various experimental and theoretical work [2, 48, 49]. Interestingly, for a  
159 small population of two cells, we (and others) have previously shown that in the presence of additional input  
160 noise before the signal passes through the nonlinearity, this ‘redundant coding’ regime exists for larger range of  
161 noise values [17–19].

162 In summary, we have derived the total mutual information and distribution of optimal thresholds in a  
163 population of binary neurons coding for the same stimulus variable for any stimulus distribution and noise level.  
164 While our results agree with previous work in the limit of no noise and an infinite population, we make unique  
165 and novel predictions – notably the surprisingly regular structure of the threshold intervals and invariance in  
166 information transmission for any ON/OFF mixture – in populations of any number of neurons and with sizable  
167 noise relevant for majority sensory systems.

## 168 **Optimizing information per spike predicts equal ON/OFF mixtures**

169 Our analysis so far showed that maximizing the information equally favors all ON-OFF mixtures independent  
170 of the noise level, although the exact distribution of population thresholds at which this information is achieved  
171 depends on noise. However, different sensory systems show dominance of OFF [50], dominance of ON [34, 51],  
172 or similar numbers of ON and OFF [34]. Therefore, we next explored what other criteria might be relevant  
173 for neural systems under the efficient coding framework. We considered that neural systems might not just be  
174 optimized to encode as much stimulus information as possible, but might do so while minimizing metabolic cost.  
175 Therefore, for each ON-OFF mixed population achieving the same total information (Fig. 2A), we calculated  
176 the mean spike count used to achieve this information. In the large population regime, if  $\alpha$  denotes the fraction  
177 of OFF cells, the mean spike count per neuron is  $r(\alpha) = R(\alpha^2 + (1 - \alpha)^2)/2$  (Methods). This mean spike count  
178 per neuron is minimized at  $\alpha = 1/2$ , where it is half of the mean spike count for the homogeneous population,  
179  $r(0) = R/2$  (Fig. 2E). This implies that it is most efficient to split the population into an equal number of ON  
180 and OFF cells. As the noise increases, the relative benefits of the equally mixed relative to the homogeneous  
181 population decrease (Fig. 2E). In the high noise regime, all mixtures produce roughly the same mean spike  
182 count per neuron of  $R/e$  (Fig. 2E). Therefore, if a sensory system is optimized to transmit maximal information  
183 at the lowest spike cost, our theory predicts similar numbers of ON and OFF neurons, which is consistent with  
184 ON-OFF mixtures encountered in some sensory systems [34].

## 185 **Minimizing mean square error of the optimal linear readout**

186 The efficient coding framework does not specify which quantity neural systems optimize to derive their structure.  
187 Until now, we have used the mutual information as a measure of coding efficiency because it tells us how well  
188 the population represents the stimulus without regard for how it can be decoded. An alternative criterion  
189 for coding efficiency is the ability of downstream neurons to decode this information. A simple biologically  
190 plausible decoding mechanism, commonly used in previous studies, is linear decoding [22, 26, 29, 30, 52]. Does  
191 this alternative measure of efficiency generate the same predictions for how sensory populations coding for the  
192 same stimulus variable should allocate their resources to ON vs. OFF neurons? Here, we examine the accuracy  
193 of a downstream neuron that estimates the stimulus value  $s$  using a weighted sum of spike counts  $n_i$  of the  
194 upstream population of neurons with thresholds  $\theta_i$  (Fig. 3A)

$$y = \sum_{i=1}^N w_i n_i + w_0. \quad (4)$$

195 The weights  $w_i$ , constant  $w_0$  and thresholds  $\theta_i$  are optimized to minimize the mean square estimation error  
196 (MSE).

## 197 **Accuracy of the optimal linear readout without noise**

198 We first consider the scenario of low noise ( $q \rightarrow 0$ , or equivalently,  $R \rightarrow \infty$ ), in which case the limitation on  
199 the accuracy of the stimulus reconstruction comes solely from the discreteness of the rate functions of each cell



200 in the population (Fig. 3B). Unlike maximizing the information, when minimizing the MSE both weights and  
 201 thresholds depend on the stimulus distribution  $p(s)$  (Fig. 3).

202 Interestingly, we find that in this low noise limit, the optimal MSE is proportional to  $1/N^2$  and is the same  
 203 for all ON/OFF mixtures, including the homogeneous population with all cells of the same type (Fig. 3C,D; see  
 204 Methods). The optimal decoding weights are given by

$$w_i = \langle s \rangle_i - \langle s \rangle_{i-1} \quad (5)$$

205 where  $\langle s \rangle_i$  are the centers of mass of intervals of  $p(s)$  intersected by neighboring thresholds

$$\sum_{0 \leq j \leq i} w_j = \frac{\int_{\theta_i}^{\theta_{i+1}} ds s p(s)}{\int_{\theta_i}^{\theta_{i+1}} ds p(s)} = \langle s \rangle_i, \quad 1 \leq i \leq N \quad (6)$$

206 where we have defined  $\theta_{N+1} = \infty$ . The optimal thresholds are the average of two neighboring centers of mass

$$\theta_i = \frac{1}{2}(\langle s \rangle_i + \langle s \rangle_{i-1}). \quad (7)$$

207 The constant term and the stimulus interval not coded by any cell depend on the ON/OFF mixture (Fig. 3C,D;  
 208 Methods). This gives a recursive relationship that from a set of initial thresholds converges to the optimal  
 209 solution (see Methods).

210 To see how this threshold distribution is different than the one predicted by the mutual information, we  
 211 first consider the large population regime. As for the mutual information, we can rewrite the thresholds  $\theta_i$  as a  
 212 continuous function  $\theta(x)$  of the cumulative stimulus values  $x = i/N$  between 0 and 1. Interestingly, the optimal  
 213 thresholds equalize not the area under the stimulus density, as in the case of the mutual information, but the  
 214 area under its one-third power

$$x(\theta) = Z \int_{-\infty}^{\theta} p(\theta')^{1/3} d\theta' \quad (8)$$

215 where  $Z$  is a normalization factor. This result has been previously derived in the context of minimizing the  
 216 distortion introduced in a pulse-coupled-modulation system due to quantization [53] (reviewed in [54]), as well  
 217 as in the context of neural coding which maximizes the  $L_p$  reconstruction error of the maximum likelihood  
 218 decoder, of which the mean squared error is the special case for  $p = 2$  [25].

219 We invert the relationship in equation 8 to derive the optimal thresholds  $\theta(x)$ . Since the optimal MSE  
 220 depends on the stimulus distribution, from now on we consider the Laplace distribution  $p(s) = 1/2 e^{-|s|}$ , which  
 221 arises when evaluating natural stimulus distributions [23, 55] and has a higher level of sparseness than the  
 222 Gaussian distribution. In this case, the optimal thresholds become (Fig. 3E,F; see Methods):

$$\theta(x) = \begin{cases} 3 \log(2x), & x \leq \frac{1}{2} \\ -3 \log(2(1-x)), & x > \frac{1}{2}. \end{cases} \quad (9)$$

223 The thresholds derived from maximizing information are the same except that the pre-factor is 1 instead of  
 224 3, making them less spread out in the tails (Fig. 3F). In particular, the largest thresholds (in magnitude) are  
 225  $\pm 3 \log(2N)$  when optimizing the MSE, three times as large as in the infomax case,  $\pm \log(2N)$ . To highlight the  
 226 different predictions for the optimal thresholds under the two efficiency measures, we also plot the cumulative  
 227 optimal thresholds  $\int_{-\infty}^{\theta(x)} p(\theta') d\theta'$  (Fig. 3G). While the optimal strategy when maximizing the information is to  
 228 emphasize stimuli with higher likelihood of occurring, minimizing the MSE of the optimal linear readout pushes  
 229 thresholds logarithmically towards relatively rare stimuli near the tails of the stimulus distribution (Fig. 3F,G).

230 Taken together, we conclude that in the absence of noise our theory derives equal performance of all ON and  
 231 OFF mixtures under the two optimality criteria, information maximization and minimizing the optimal linear  
 232 readout. However, a key difference between the two criteria is the theoretically predicted optimal distribution  
 233 of thresholds.

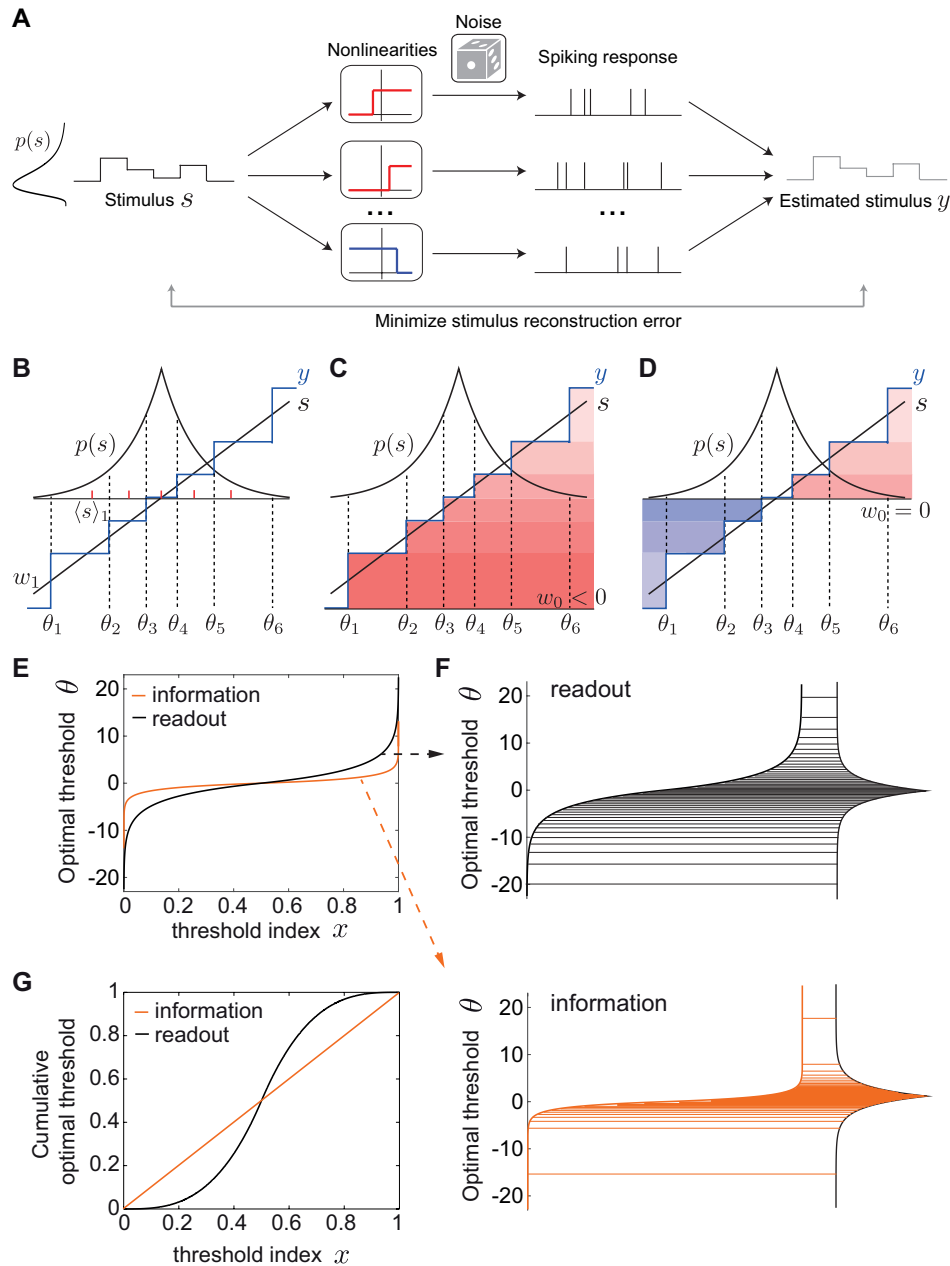

**Figure 3. Optimal linear decoding of stimuli.** **A**. Framework schematic. A stimulus  $s$  from a probability distribution  $p(s)$  is encoded by the spiking responses of a population of ON (red) and OFF (blue) cells. We optimize the cells' nonlinearities by minimizing the mean squared error (MSE) between the original stimulus  $s$  and the linearly reconstructed stimulus  $y$  from the spiking response. **B**. Minimizing the MSE between a stimulus  $s$  (black) and its linear estimate  $y$  (blue) by a population of (6) ON and OFF cells, in the absence of noise. We show the optimal weight  $w_1$  and the center of mass  $\langle s \rangle_1$  of the first threshold interval (red dashes). **C, D**. Any ON-OFF population can achieve the same error with the same set of optimal thresholds and weights but a different constant,  $w_0$ . **C**. 6 ON cells ( $w_0 < 0$ ). **D**. 3 OFF and 3 ON cells ( $w_0 = 0$ ). **E**. The optimal thresholds equalize not the area under the stimulus density (as in the case of the mutual information), but the area under its one-third power (Eq. 8). The optimal thresholds are shown for the Laplace distribution. **F**. The information maximizing thresholds partition the Laplace distribution into intervals that code for stimuli with higher likelihood of occurrence (bottom), while minimizing the MSE pushes thresholds to favor rarer stimuli near the tails of the distribution (top). Threshold distributions are the same as in E. **G**. The cumulative optimal thresholds  $\int_{-\infty}^{\theta(x)} p(\theta') d\theta'$  (compare to E).



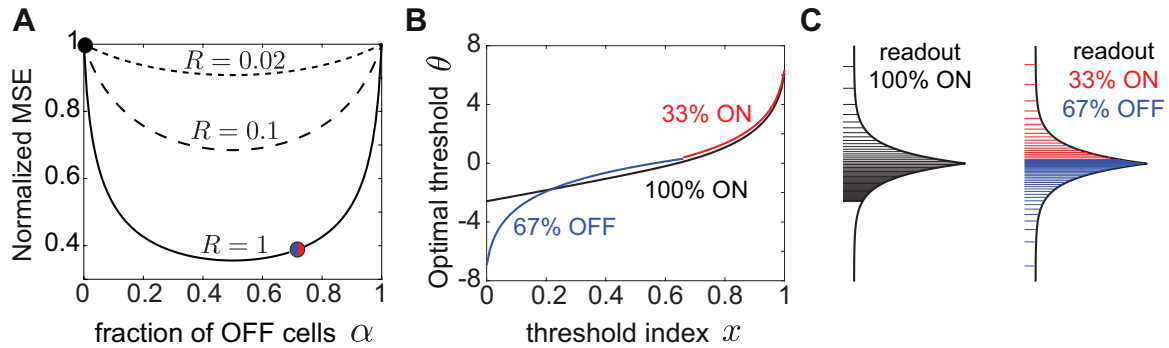

**Figure 4. Optimal linear decoding of stimuli with noise depends on the ON/OFF mixture.** **A.** The MSE as a function of the fraction of OFF cells in the population,  $\alpha$ , for a different expected spike count,  $R$ . The MSE was normalized to the MSE for the homogeneous population of all ON cells. The MSE is shown for  $N = 100$  cells and for the Laplace distribution. Symbols indicate the MSE values realized with the thresholds in B and C. **B.** The optimal thresholds for the homogeneous population (black) partition the Laplace stimulus distribution starting with a much larger first threshold than the mixed population with 2/3 OFF cells (blue) and 1/3 ON cells (red). **C.** The optimal thresholds for the Laplace distribution for a homogeneous population (black) and a mixed population with 2/3 OFF cells (blue) and 1/3 ON cells (red). In B and C,  $R = 1$ . Note the difference in the optimal threshold distribution between the mixed ON/OFF and the homogeneous ON population, especially for small  $x = i/N$  (logarithmic in blue vs. linear in black).

## Mixed ON/OFF populations in the presence of noise

In biologically realistic scenarios with non-negligible noise, however, we find that mixed ON/OFF populations show a dramatic improvement of the MSE over predominantly homogeneous populations (Fig. 4A). For the Laplace distribution we have considered so far, and different noise values, we find that the optimal fraction of OFF cells in the population is  $\alpha = 1/2$ . Although there is a unique best ON/OFF mixture, the best linear stimulus reconstruction achieved by other populations with ON-OFF mixtures closer to the optimal 1/2 mixture is similar (i.e. the MSE around  $\alpha = 1/2$  is flat). The worst stimulus reconstruction is achieved by the homogeneous population with all cells of ones type (all ON or all OFF), which has the highest MSE. As the noise  $q$  decreases ( $R$  increases) further, this difference in performance between the mixed and homogeneous populations becomes quite dramatic, see for example  $R = 1$  (Fig. 4A).

In addition to the big difference in coding performance between mixed and homogeneous populations, incorporating biologically realistic noise also affects the theoretically derived distribution of optimal thresholds (Fig. 4B). While in mixed populations the thresholds are distributed logarithmically towards relatively rare values at the tails of the stimulus distribution (Eq. 9; see Fig. 4B,C and Methods), for the homogeneous population the optimal thresholds exhibit a distinct asymmetry. A large fraction of thresholds are distributed linearly as a function of their index, while the remaining thresholds are distributed logarithmically as before:

$$\theta(x) = \begin{cases} -(1-x) \log(RN), & 0 < x \leq \left(1 - \frac{\sqrt{2}}{\log(RN)}\right)^{-1} \\ -2 \log(1-x), & \left(1 - \frac{\sqrt{2}}{\log(RN)}\right)^{-1} < x \leq 1, \end{cases} \quad (10)$$

although the noise has the effect of concentrating the thresholds near more likely stimuli, increasing the redundancy of the code. Moreover, the smallest threshold for the homogeneous population is much larger than the smallest threshold for any mixed population, suggesting that there is a large region of stimuli that is not coded by any cell in the homogeneous case (Fig. 4C), which is the reason for the significantly lower MSE.

In summary, using the MSE of the optimal linear decoder as a measure of efficiency can fundamentally alter our conclusions about how to split a population into ON and OFF cells and how to distribute the population thresholds to achieve the optimal stimulus reconstruction. At biologically realistic noise levels, coding by mixed ON-OFF populations is much better than by a homogeneous population, with qualitatively distinct optimal

258 threshold distributions.

## 259 **The optimal ON-OFF mixture of the linear readout depends on the asymmetry in** 260 **the stimulus distribution**

261 Since the MSE as a measure of efficiency depends on the stimulus distribution, we asked how the stimulus  
262 distribution can affect optimal population coding. The distribution of natural stimuli may be asymmetric  
263 around the most likely stimulus. For example, the distribution of contrasts in natural images, and the intensity  
264 of natural sounds are indeed skewed towards more negative values [20, 56–61]. Therefore, we instead consider  
265 an asymmetric Laplace distribution  $p(s) \propto e^{s/\tau_-}$  for  $s < 0$  and  $p(s) \propto e^{-s/\tau_+}$  for  $s \geq 0$  where we take  $\tau_- > \tau_+$ .  
266 Minimizing the MSE one finds that the optimal way to divide a population into ON and OFF respects these  
267 stimulus asymmetries. Increasing the negative stimulus bias  $\tau_-/\tau_+$  favors more OFF cells (Fig. 5A,B). The  
268 optimal thresholds for these different stimulus biases are best compared in the cumulative space of stimulus  
269 (Fig. 5C). Increasing the bias also pushes the thresholds towards more negative stimulus values, which occur  
270 with higher probability than positive stimuli.

271 At a fixed level of stimulus bias, increasing the noise further accentuates the asymmetry in the optimal  
272 ON-OFF mixture (Fig. 5D,E). As the noise becomes non-negligible, the optimal thresholds lose the logarithmic  
273 spread at the tails of the stimulus distribution and begin to code for more likely stimuli that occur with a higher  
274 probability. At the same time, a larger region of stimulus values near the median is no longer coded by any  
275 cells, i.e. the gap between ON and OFF thresholds becomes larger (Fig. 5F). Had we considered the limit of  
276 zero noise or infinitely large populations as previous studies [22–25], we would not have been able to identify  
277 these differences between the optimal thresholds that result in conditions of biologically realistic noise and finite  
278 populations.

279 In summary, our theory predicts different optimal ON-OFF numbers at which the lowest MSE is achieved  
280 depending on asymmetries in the stimulus distribution and the noise level. Indeed in nature, the relative  
281 predominance of ON and OFF cells in diverse sensory systems can be different (Table 1). Therefore, if we know  
282 the natural stimulus distribution being encoded by a population and the bounds on cells' firing rates, we can  
283 predict the optimal ON and OFF numbers, as well as the response thresholds of the cells and compare them to  
284 experimental observations.

## 285 **Predicting stimulus distributions from experimentally measured thresholds**

286 Here we propose to reverse our efficient coding framework and starting from an experimentally measured dis-  
287 tribution of thresholds, to predict the distribution of natural stimuli that the thresholds could be optimized to  
288 encode (Fig. 6A). This could be particularly relevant for sensory systems where the distribution of the sensory  
289 variable being encoded is unknown. We decided to test this approach on odor concentration coding in the  
290 olfactory system of *Drosophila* larvae given recently published data [37]. The first stage of olfactory processing  
291 in *Drosophila* larvae is implemented by a population of 21 olfactory receptor neurons (ORNs), which code for a  
292 broad space of odorants and concentrations [37]. We hypothesized that these ORNs might have distributed  
293 their thresholds at different concentrations to optimally encode any particular odor. In the classical efficient  
294 coding approach, knowing the distribution of odor concentrations would allow us to predict the optimal thresh-  
295 olds. In the reversed approach that we use here, knowing the distribution of thresholds allows us to predict the  
296 distribution of concentrations of a known odor (Fig. 6A).

297 A recent study estimated these thresholds by recording from the entire ORN population [37]. The responses  
298 for 34 odorants over a five-fold magnitude in concentration were well described by a common Hill function  
299 with a shared steepness, but different activation thresholds. Pooling all thresholds across the different odorants  
300 and concentrations revealed a power law distribution. To use this threshold distribution in our theoretical  
301 framework, where a range of thresholds codes for the intensity of a single stimulus, we had to make a critical  
302 assumption. Specifically, we assumed that the population thresholds spanning the range of concentrations for  
303 any one odor are a shuffled version of the population thresholds for other odorants. This was justified by an  
304 analysis of a related data set [35], in which the distribution of ORN firing rates was found to be stereotyped  
305 across different odors [36].

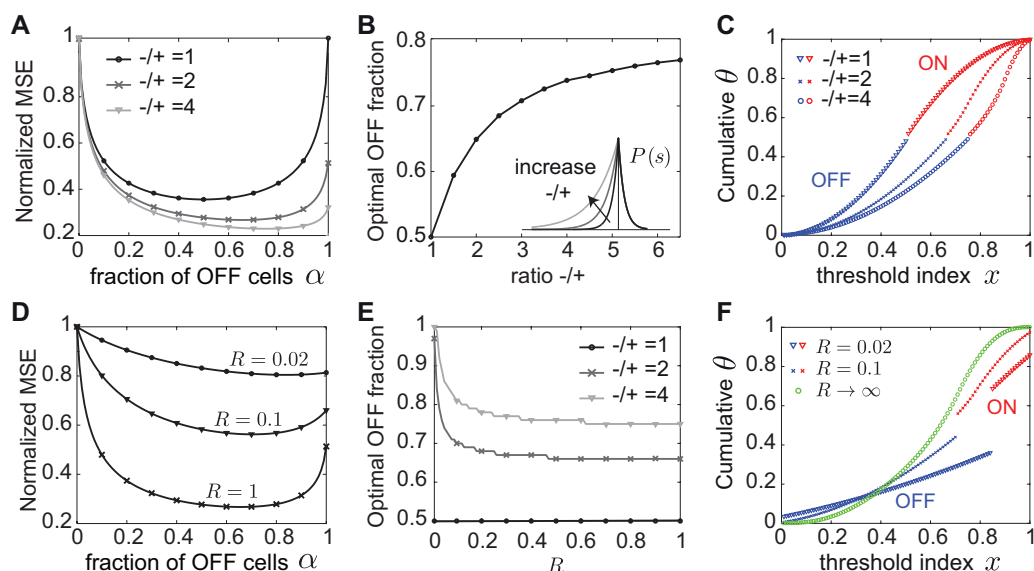

**Figure 5. The optimal ON/OFF mixture derived from the linear readout is tuned to asymmetries in the stimulus distribution.** **A.** The MSE as a function of the fraction of OFF cells ( $\alpha$ ) normalized to that for the homogeneous population of all ON cells ( $\alpha = 0$ ). The MSE is shown for an asymmetric Laplace distribution with varying negative to positive bias  $-/+$ , expected spike count  $R = 1$  and  $N = 100$  neurons. **B.** The optimal fraction of OFF cells as a function of stimulus bias of the asymmetric Laplace distribution and  $R = 1$ . **C.** The optimal thresholds for the ON-OFF mixtures (50%, 66% and 75%) in A that yield the lowest MSE, while varying negative to positive bias  $-/+ = \{1, 2, 4\}$ . **D.** Same as A but for an asymmetric Laplace distribution with a negative bias  $-/+ = 2$  and varying  $R$  (equivalently, noise). **E.** The optimal fraction of OFF cells as a function of  $R$  for different stimulus bias of the asymmetric Laplace distribution. **F.** The optimal thresholds for the ON-OFF mixtures (84%, 70% and any) in D that yield the lowest MSE, while varying  $R = \{0.02, 0.1, \infty\}$ .

306 Using our optimal coding framework with a population of only ON neurons (since ORNs have monotonically  
 307 increasing response functions with concentration), we derived the mostly likely stimulus distribution of odorant  
 308 concentrations for each of the two efficiency measures. The predicted distribution of odorant concentrations  
 309 follows a power law distribution with an exponent determined by the efficiency measure. Given a measured  
 310 distribution of thresholds which follows a power law with an exponent of  $-0.58$  (Methods, Fig. 6B,C) and  
 311 assuming an infomax code we predict that the distribution of odorant concentrations should also be a power  
 312 law with an exponent of  $-0.58$  (Methods, Fig. 6D). In contrast, assuming a code that minimizes the stimulus  
 313 reconstruction error, the distribution of odorant concentrations should be a power law with an exponent of  
 314  $-1.74$  (Methods, Fig. 6D). Indeed, many processes like convection and turbulence can generate power law  
 315 dynamics [62], but the exact exponents will need to be determined, for instance by measuring the volatiles from  
 316 natural environments [63, 64]. Although complex temporal dynamics in the stimulus can further complicate  
 317 ORN coding of fluctuating odorant concentrations, the measured temporal filter across ORNs is remarkably  
 318 stereotyped, suggesting that the olfactory code is similar between static and dynamic odor environments.

319 We note that in our analysis we explicitly assume that the goal of the olfactory system is to estimate the  
 320 concentration of any one odor with high fidelity, therefore it is only valid for experiments where only one odor is  
 321 present. However, the optimization problem faced by the olfactory system might be different, i.e. to determine  
 322 which, of many, odors are present. Therefore, it is possible that the optimal thresholds in these two cases may  
 323 be different.

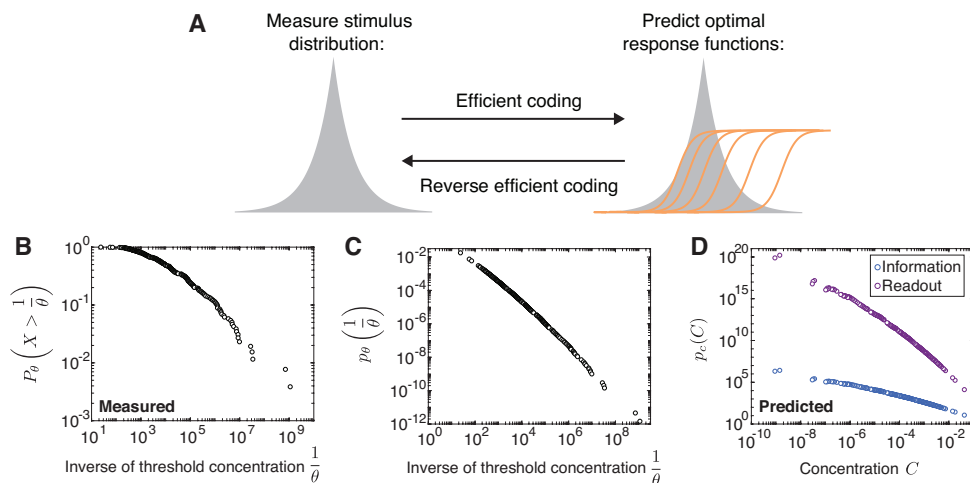

**Figure 6. Deriving a distribution of stimulus intensities from experimentally measured thresholds. A.** Our efficient coding framework enables us to predict the optimal distribution of thresholds given a known stimulus distribution. By reversing our framework, we derive the stimulus distribution from a distribution of measured thresholds assuming optimal coding under the two optimality criteria. **B.** Log-log plot of the cumulative distribution of the inverse of thresholds from measured dose-response curves of the entire population of ORNs in the *Drosophila* larva olfactory system [37]. This is well described by a power law with exponent  $-0.42$ . **C.** The probability distribution of the inverse of optimal thresholds derived from the data in B. This is well described by a power law with exponent  $-0.58$ . **D.** Predicted distribution of concentrations across different odorants when assuming optimal coding by maximizing information or minimizing the MSE of the best linear decoder. This is well described by a power law with exponents  $-0.58$  and  $-1.74$ , respectively. The proportionality constant is not shown.

## 324 Discussion

325 Information in neural circuits is processed by many different cell types, but it remains a challenge to understand  
 326 how these distinct cell types work together. Here we treat a puzzling aspect of neural coding, how do discrete  
 327 cell types conspire to collectively encode a single relevant variable in responses of opposite polarity? To evaluate  
 328 such a population code we built on the framework of efficient coding and extended it in several novel ways: by  
 329 considering nonlinear processing, biologically realistic levels of noise, short coding windows, and the coordination  
 330 of responses in populations of any size – factors which may vary across sensory systems. We then derived two  
 331 aspects of the population code, namely how to optimally split a population into ON and OFF cells, and how to  
 332 allocate the thresholds of the individual neurons as a function of the noise level, the stimulus distribution and  
 333 the optimality measure.

## 334 Optimal ON-OFF mixtures and comparison to experimental data

335 We considered two different measures of coding efficiency that are in common use [22, 26–30]: the mutual  
 336 information between stimulus and responses, and the mean squared error of the linearly reconstructed stimulus.  
 337 The first aspect of our predictions applies to the expected mixture of ON and OFF cells. If one chooses mutual  
 338 information as the efficiency measure, then all ON/OFF mixtures in the population perform identically once the  
 339 thresholds are adjusted (Fig. 2). This result holds independent of the noise level and the shape of the stimulus  
 340 distribution, and generalizes for response functions with any number of discrete firing rate levels. However, the  
 341 number of spikes required for this performance, and thus the metabolic cost, differs greatly depending on the  
 342 ON/OFF ratio. If one considers the information per spike as the relevant measure, then a system with equal  
 343 number of ON and OFF cells is most efficient.

344 When we require the stimulus to be read out by an optimal linear readout, different ON/OFF mixtures  
 345 also achieve similar coding performance but only in the absence of noise (Fig. 3). In the biologically relevant  
 346 regimes of non-negligible noise, noise has a dramatic influence on the optimal performance realized by different

347 ON/OFF mixtures (Fig. 4). Populations with a similar number of ON and OFF cells have a much smaller  
348 decoding error than populations dominated by one cell type. The extreme case of the homogeneous population  
349 performs substantially worse than any mixed population (Fig. 4). In the case of asymmetries in the stimulus  
350 distribution, as encountered in many natural sensory stimulus distributions [20, 56–61], minimizing the linear  
351 reconstruction error predicts that the optimal ON/OFF mixture should be tuned to these asymmetries and the  
352 amount of noise (Fig. 5).

353 How do these predictions accord with known neural codes? Since our theory applies to populations of sensory  
354 neurons that code for the same stimulus variable, we need to consider sensory systems where this is the case.  
355 Analyzing raw stimulus values, such as the light intensity in a natural scene or the intensity of natural sounds,  
356 results in distributions which are skewed towards negative stimuli [20, 56–61]. Our linear decoding theory then  
357 predicts that more resources should be spent on OFF. Indeed, in the fly visual system, the OFF pathway is  
358 overrepresented in the circuit for computations that extract motion vision, with the L1 neurons being responsible  
359 for the processing of ON signals, while both L2 and L3 neurons for OFF [9, 50]. These neurons are repeated in  
360 each cartridge, thus together code for the same spatial location. Hence, at least for the fly visual system, our  
361 efficient coding results are in accord with naturally encountered ON/OFF ratios. In contrast, the vertebrate  
362 retina represents a visual stimulus with spikes across diverse types of retinal ganglion cells, which differ in their  
363 spatial and temporal processing characteristics [65, 66]. Certain types of ganglion cell come in ‘paramorphic  
364 pairs,’ meaning an ON-type and an OFF-type that are similar in all other aspects of their visual coding. A  
365 previous study by Ratliff et al. (2010) derived the optimal numbers of ON and OFF retinal ganglion cells for  
366 encoding natural scenes assuming maximal information transmission, as a function of the spatial statistics in  
367 these natural stimuli. In their model, every ganglion cell in the population encodes a different stimulus variable,  
368 because it looks at a different spatial location. In contrast, our theory can only be applied to populations that  
369 code for the same stimulus feature, which may in fact contain only one of each type (ON and OFF),  
370 but requires further experiments to determine the exact numbers. To properly account for all thirty types of  
371 retinal ganglion cells will require more complete models that include the spatial dimension and the encoding of  
372 different visual features.

373 Besides the visual system, there are other examples in biology where different numbers of ON and OFF  
374 cells are encountered, and where our theory more naturally applies with populations of neurons encoding a  
375 one-dimensional stimulus (Table 1). Single neurons in monkey somatosensory cortex show diverse ON and OFF  
376 responses to the temporal input frequency of mechanical vibration of their fingertips. While most neurons  
377 in primary somatosensory cortex (S1) tune with a positive slope to the input frequency (ON), about half of  
378 the neurons in secondary somatosensory cortex (S2) behave in the opposite way (OFF) [33, 34]. Opposite  
379 polarity pathways are also observed in thermosensation, where receptor proteins activated directly by positive  
380 and negative changes in temperature enable the detection of thermal stimuli. Four mammalian heat-activated  
381 and two cold-activated ion channels have been shown to function as temperature receptors [31, 32]. Given these  
382 observations of ON-OFF asymmetries, one is led to conclude that information per spike may not be the cost  
383 function that drove evolution of this system, since that would predict equal numbers of ON and OFF cells.  
384 Thus, whether these different experimental observations are consistent with maximizing mutual information,  
385 optimal linear decoding, or yet a different objective function or task (e.g. [67–69]), remains to be seen (see also  
386 our discussion on the generality of assumptions). Other neuronal systems are candidates for similar analysis,  
387 for instance, auditory nerve fibers [44], motor cortex [70], and primary vestibular neurons [71].

## 388 **Optimal threshold distributions and comparison to experimental data**

389 Beyond predicting ON-OFF numbers, which has been the main focus of different models about the vertebrate  
390 retina [20], we also predict the structure of response thresholds. Generally, maximizing information implements  
391 an optimal strategy which emphasizes stimuli that occur with higher probability (Fig. 3, 4). In the limit of  
392 low noise, this is consistent with the well-known strategy of ‘histogram equalization’ [4], but we generalize  
393 this result to any amount of biologically realistic noise. Importantly, the optimal interval size depends on the  
394 level of noise with larger noise favoring smaller threshold intervals, implying a strategy closer to redundant  
395 coding. In contrast to the information, minimizing the mean square error of the linear readout implements a  
396 more conservative strategy that utilizes more cells in the encoding of rarer stimuli due to a larger error penalty



**Table 1.** List of experimentally measured ON and OFF neuron numbers in different sensory systems.

| Sensory system                                    | ON/OFF numbers   |
|---------------------------------------------------|------------------|
| Primary somatosensory cortex S1 (primate) [34]    | ON dominance     |
| Secondary somatosensory cortex S2 (primate) [34]  | ON $\approx$ OFF |
| Visual system (insect) [50]                       | OFF dominance    |
| Olfactory system (mammalian, insect) [35, 72, 73] | Unknown          |
| Thermosensory system (mammalian, insect) [31, 32] | OFF dominance    |
| Mechanosensory system (mammalian) [51]            | ON dominance     |

(Fig. 3, 4).

Our theoretical framework applies to the case when the distribution of stimuli encoded by the cells is known, and the only problem is to estimate the value of the stimulus by appropriately distributing the cells' thresholds. In the case of vision, for example, this implies estimating the light intensity or contrast level. A direct test of our theoretical predictions for the optimal thresholds would require simultaneous measurement of the population response thresholds, which is within reach of modern technology [66]. In the meantime, we reversed our theoretical approach and starting from an experimentally measured distribution of thresholds, we predicted the distribution of natural stimuli that the thresholds might optimally encode. We applied this approach for the population of ORNs in the olfactory system of *Drosophila* larvae. However, unlike vision, applying our framework to olfaction presents a different problem. Here, the goal of the olfactory system is primarily to determine whether or not an odor is present, not its concentration. Therefore, our analysis is only appropriate when only one odor is present, and it can be inferred with high certainty. In this case, we assumed that the ORNs code for the distribution of concentrations of the present odor by diversifying their thresholds. The ORNs' experimentally described tuning curves were identical in shape, with response thresholds following a power law distribution [37]. Since the probability distribution of ORN firing rates is stereotyped across different odors [36], we assumed that the thresholds coding the range of concentrations for any one odor are a shuffled version of the thresholds for other odorants. We derived the stimulus distribution of concentrations for any one tested odor, under the two optimality measures, the maximal mutual information and the minimal error of the best reconstructed stimulus (Fig. 6). This threshold distribution was also a power law with an exponent dependent on the efficiency measure. Whether these distributions correspond to distributions of odorant concentrations found in natural olfactory environments remains to be tested, and techniques for collecting the volatiles from natural encountered odors now exist [63, 64]. These distributions would be strongly influenced by processes like convection and turbulence, which can give rise to power law dynamics [62]. Although these are dynamical variables that fluctuate in time, we propose that the distributions can be build by pooling different aspects of the dynamics over extended time periods. In that context, our theoretical framework would apply to populations which have been adapted to these distributions over those long periods of time. It is possible that when considering a different optimization problem implemented by the olfactory system which aims to determine which, of many, odors are present, a very different distribution of thresholds than those our theory predicts would be optimal.

## Generality of assumptions and relationship to previous work

The two efficiency measures that we have used are entirely agnostic about the content of signal transmission. However, faithful encoding of signals is not the only fitness requirement on a sensory system, for example, some stimuli may have greater semantic value than others. Or, the aim may be to extract task-relevant sensory



430 information as in the case of the Information Bottleneck framework [67, 68], or to achieve optimal inference  
431 of behaviorally-relevant properties in dynamic stimulus environments [69]. Other recent approaches, such as  
432 Bayesian efficient coding, optimize an arbitrary error function [74]. Since our framework aims to encode a  
433 stimulus as best as possible, we propose that it may be most appropriate for early sensory processing, where  
434 stimulus representation might be the goal.

435 The efficient coding hypothesis was originally proposed by Attneave [75] and Barlow [1], who studied deter-  
436 ministic coding, in the absence of noise. Since then, many studies have investigated efficient coding strategies  
437 under different conditions. Atick and Redlich introduced noise and demonstrated that efficient coding can be  
438 used to explain the center-surround structure of receptive fields of retinal ganglion cells, which changes to center-  
439 only structure as the signal-to-noise increases [2, 76]. Including nonlinear processing in the limit of low noise  
440 produced Gabor-like filters encountered in the primary visual cortex [13]. However, we now know that already  
441 the very first stages of processing in many sensory systems are nonlinear, consist of many parallel pathways  
442 and exhibit substantial amount of noise [77] – important aspects of coding that we simultaneously incorporate  
443 in our analysis. Our work differs from a previous report on ON and OFF cells in the vertebrate retina which  
444 proposed a simplified noise model implemented by assuming a finite number of signaling levels (i.e. firing rates),  
445 which does not incorporate spiking [20].

446 We considered a Poisson noise model of spiking which is commonly used in many studies. Our results are  
447 especially relevant in the high noise regime, which corresponds to short coding windows commonly encountered  
448 in biology, for instance, a few spikes per coding window [28, 38, 78]. In the low noise regime when the coding  
449 window is sufficiently long, or there is a large number of neurons, our results agree with previous studies on  
450 infomax and the optimal linear readout [4, 25, 79]. Efficient coding in the high noise regime has previously been  
451 examined, but only in terms of the transfer function of a single neuron, which was shown to be binary [27, 43].  
452 We go beyond this work and provide analytical solutions for how a population of neurons should coordinate  
453 their response ranges to optimally represent a given stimulus in the realistic regimes of short encoding times.

454 We used a binary rate function to describe single neuron responses because it gives our problem analytical  
455 tractability and it still represents a significant departure from previous efficient coding frameworks based on  
456 linear processing [2, 3, 20, 21], long coding windows or infinitely large populations [22–25]. Indeed, discretization  
457 in neural circuits is a common phenomenon that is not only relevant for sensory coding, but also for neuropeptide  
458 signaling, ion channel distributions and information transmission in genetic networks [39, 80]. Considering more  
459 general nonlinearities is currently only tractable with numerical simulations or in the case of optimizing a local  
460 efficiency measure, the Fisher information, which may not accurately quantify coding performance in finite size  
461 populations or biologically realistic noise (e.g. low firing rates or short coding windows) [25, 49, 81–83].

## 462 Summary

463 Given the ubiquity of ON/OFF pathway splitting in different sensory modalities and species, our framework  
464 provides predictions for the optimal ON/OFF mixtures and the functional diversity of sensory response proper-  
465 ties that achieve this optimality in many sensory systems based on the distribution of relevant sensory stimuli,  
466 the noise level and the measure of optimality. Our theoretical approach is sufficiently general and is not fine-  
467 tuned to the specifics of any one experimental system. The different predictions that we make depending on the  
468 model assumptions could help determine the specific optimality criteria operating in different sensory systems  
469 where different ON-OFF mixtures and tuning properties have been observed. Directed experiments to compare  
470 the predicted and measured threshold distributions will test whether the efficient coding criteria proposed here  
471 are a likely constraint shaping the organization and adaptation of sensory systems.

## 472 Materials and Methods

### 473 Mutual information and proof of the Equal Coding Theorem

474 First we prove the Equal Coding Theorem for a general population with  $N$  binary neurons. Without loss of  
475 generality we assume that the neurons' thresholds are:

$$\theta_1 \leq \dots \leq \theta_N \quad (11)$$

476 and we define the special  $\theta_0 = -\infty$  and  $\theta_{N+1} = \infty$ . The Shannon mutual information between the stimulus  $s$   
477 and the spiking response  $\mathbf{n}$  of the population is the difference between response and noise entropy:

$$I(s, \mathbf{n}) = H(\mathbf{n}) - H(\mathbf{n}|s) = -\langle \log p(\mathbf{n}) \rangle_{\mathbf{n}} + \sum_{i=1}^N \langle \log p(n_i|s) \rangle_{n_i, s} \quad (12)$$

478 where  $\langle \cdot \rangle_x$  denote averages over the distribution  $p(x)$  and  $p(\mathbf{n}) = \langle p(\mathbf{n}|s) \rangle_s$ . We assume that stimulus encoding  
479 by all neurons is statistically independent conditional on  $s$  so that

$$p(\mathbf{n}|s) = \prod_{i=1}^N p(n_i|s). \quad (13)$$

480 Given the Poisson noise model, knowing the stimulus  $s$  unambiguously determines the response firing rate  $\nu$ ;  
481 for instance, for an ON cell if  $s < \theta$ ,  $\nu = 0$  and if  $s \geq \theta$ ,  $\nu = \nu_{\max}$ . We can replace  $p(n_i|s)$  with  $p(n_i|\nu)$  which is  
482 Poisson distributed:  $p(n_i|\nu) = \frac{[\nu T]^{n_i}}{n_i!} e^{-\nu T}$ .

We prove that  $I(s; \mathbf{n}) = I(\nu, \mathbf{n})$ . To see this, we write

$$I(s, \mathbf{n}) = \sum_{\mathbf{n}} \int_s ds p(s) p(\mathbf{n}|s) \log \frac{p(\mathbf{n}|s)}{p(\mathbf{n})} \quad (14)$$

$$= H(\mathbf{n}) + \sum_{\mathbf{n}} \int_s ds p(s) p(\mathbf{n}|s) \log p(\mathbf{n}|s). \quad (15)$$

Using Eq. 13, this becomes

$$I(s, \mathbf{n}) = H(\mathbf{n}) + \sum_{\mathbf{n}} \int_s ds p(s) \prod_j p(n_j|s) \sum_i \log p(n_i|s) \quad (16)$$

$$= H(\mathbf{n}) + \sum_i \sum_{n_i} \int_s ds p(s) p(n_i|s) \log p(n_i|s) \quad (17)$$

Similarly, we derive

$$I(\nu, \mathbf{n}) = \sum_{\mathbf{n}} \sum_{\nu} p(\nu) p(\mathbf{n}|\nu) \log \frac{p(\mathbf{n}|\nu)}{p(\mathbf{n})} \quad (18)$$

$$= H(\mathbf{n}) + \sum_{\mathbf{n}} \sum_{\nu} p(\nu) p(\mathbf{n}|\nu) \log p(\mathbf{n}|\nu) \quad (19)$$

483 which since

$$p(\mathbf{n}|\nu) = \int_s ds p(\mathbf{n}|s) p(s|\nu) = \prod_i \int_s ds p(n_i|s) p(s|\nu) = \prod_i p(n_i|\nu) = \prod_i p(n_i|\nu_i) \quad (20)$$

becomes

$$I(\nu, \mathbf{n}) = H(\mathbf{n}) + \sum_{\mathbf{n}} \sum_{\nu} p(\nu) p(\mathbf{n}|\nu) \sum_i \log p(n_i|\nu_i) \quad (21)$$

$$= H(\mathbf{n}) + \sum_i \sum_{n_i} \sum_{\nu_i} p(\nu_i) p(n_i|\nu_i) \log p(n_i|\nu_i). \quad (22)$$

Now, for a given  $i$  and a corresponding given spike count  $n_i$ , which without loss of generality we assume is an ON cell with threshold  $\theta_i$ , we take the second term from Eq. 17 and split the integral:

$$\int_s ds p(s)p(n_i|s) \log p(n_i|s) = \int_{-\infty}^{\theta_i} ds p(s)p(n_i|s) \log p(n_i|s) + \int_{\theta_i}^{\infty} ds p(s)p(n_i|s) \log p(n_i|s) \quad (23)$$

$$\begin{aligned} &= \int_{-\infty}^{\theta_i} ds p(s)p(n_i|\nu_i = 0) \log p(n_i|\nu_i = 0) + \int_{\theta_i}^{\infty} ds p(s)p(n_i|\nu_i = \nu_{\max}) \log p(n_i|\nu_i = \nu_{\max}) \\ &= \sum_{\nu_i} p(\nu_i)p(n_i|\nu_i) \log p(n_i|\nu_i) \end{aligned} \quad (24)$$

484 because we can just integrate out the  $s$ . Therefore, from Eqs. 17, 22 and 24, we get  $I(s; \mathbf{n}) = I(\boldsymbol{\nu}, \mathbf{n})$ . Note  
485 that for a single cell, Nikitin et al. [43] also proved the same equality of information using a different approach.

For a binary response function with two firing rate levels, 0 and  $\nu_{\max}$ , we can lump together all states with *nonzero* spike counts into a single state which we denote as  $\mathbf{1}$ . Correspondingly, the state with zero spikes is  $\mathbf{0}$ . Hence, we can evaluate the mutual information between stimulus and spiking response using the following expressions for the spike count probabilities:

$$\begin{aligned} p(\mathbf{0}|\nu = 0) &= 1, & p(\mathbf{1}|\nu = 0) &= 0, \\ p(\mathbf{0}|\nu = \nu_{\max}) &= q, & p(\mathbf{1}|\nu = \nu_{\max}) &= 1 - q, \end{aligned} \quad (25)$$

486 where  $q = e^{-R}$  and  $R = \nu_{\max}T$  denote the level of noise in the system.

487 We can derive the expression for the mutual information between stimulus and response given the  $N$  intervals

$$u_i = \int_{\theta_{N+1-i}}^{\infty} ds p(s), \quad i = 1, \dots, m \quad (26)$$

488 for the  $m$  ON cells and

$$u_i = \int_{-\infty}^{\theta_{i-m}} ds p(s), \quad i = m + 1, \dots, N \quad (27)$$

489 for the OFF cells, see Figure 7.

490 We prove the Equal Coding Theorem by showing that the mutual information coded by a population of  $N$   
491 ON cells is the same as that for any arbitrary mixture of ON and OFF cells, for instance, a population with  $m$   
492 ON cells (with indices  $1, 2, \dots, m$ ) and  $N - m$  OFF cells (with indices  $m + 1, \dots, N$ ). At the optimal solution  
493 the ON cells have larger thresholds than the OFF cells. This is due to the assumed Poisson noise model, where  
494 the states at which a given cell's firing rate is 0 are non-noisy and determine the stimulus with certainty. The  
495 total information can be described as the information from observing the ON cells  $1, \dots, m$ , plus any additional  
496 information gained from observing cells  $m + 1, \dots, N$ . Below we demonstrate that this additional information  
497 is identical independent of whether the  $N - m$  cells are ON (in which case the population is homogeneous and  
498 comprised of all ON cells) or OFF type (in which case the population is mixed). This turns out to be the case,  
499 as long as the thresholds of the additional  $N - m$  cells are appropriately adjusted.

500 If a spike was observed from ON cells  $1, 2, \dots, m$ , then no additional information is gained from cells  $m +$   
501  $1, \dots, N$ , independent of their type because their firing rate is constant over the entire stimulus interval in which  
502 cells  $1, \dots, m$  fire. Then, the total mutual information achieved by all  $N$  cells,  $I_N(s, \mathbf{n})$ , is equal to the mutual  
503 information obtained from observing the  $m$  ON cells,  $I_m(s, \mathbf{n})$ :

$$I_N(s, \mathbf{n}; \{u_1, \dots, u_N\}) = I_m(s, \mathbf{n}; \{u_1, \dots, u_m\}) \quad (28)$$

504 where we explicitly denote the dependence of the mutual information on the threshold intervals,  $u_i$ 's. If no  
505 spike was observed from the ON cells  $1, 2, \dots, m$ , then we get additional information from the remaining cells  
506  $m + 1, \dots, N$ , but we need to consider the change in the stimulus distribution posterior to seeing no spike.  
507 Such a change in the stimulus distribution is equivalent to adjusting the thresholds of cells  $m + 1, \dots, N$ , and

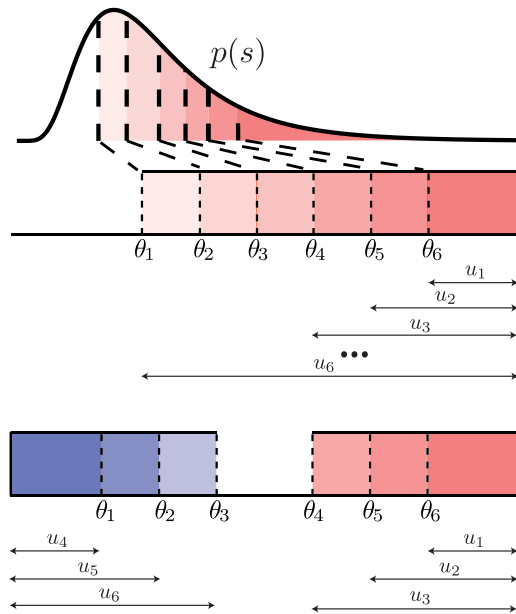

**Figure 7.** Thresholds  $\theta_i$  and intervals between thresholds  $u_i$  for a population of 6 cells. Top: a homogeneous population with 6 ON cells; bottom: a mixed population with 3 ON and 3 OFF cells.

508 as a result, the threshold intervals. If none of the ON cells  $1, \dots, m$  fired, then, we can formally write the total  
509 information as follows (see Fig. 7):

$$I_N(s, \mathbf{n}; \{u_1, \dots, u_N\}) = I_m(s, \mathbf{n}; \{u_1, \dots, u_m\}) + Q_m I_{m+1, \dots, N|1, \dots, m}(s, \mathbf{n}; \{u'_{m+1}, \dots, u'_N\}) \quad (29)$$

510 where  $Q_m$  is the probability that none of the ON cells  $1, \dots, m$  fired, and  $I_{m+1, \dots, N|1, \dots, m}$  is the additional  
511 mutual information gained from the remaining  $N - m$  cells with adjusted thresholds, and consequently threshold  
512 intervals,  $u'_i$ .

513 By writing the information in this manner, we have only assumed that the first  $m$  cell are ON, but have  
514 not assumed anything about the type of the additional  $N - m$  cells. In fact, for any ON-OFF mixture given  
515 by the number of ON cells  $m$ , one can choose the same thresholds  $\theta_1, \dots, \theta_m$  (and thus thresholds intervals  
516  $u_1, \dots, u_m$ ) for the first  $m$  ON cells, and then change the thresholds  $\theta_{m+1}, \dots, \theta_N$  (and thus threshold intervals  
517  $u_{m+1}, \dots, u_N$ ) of the remaining  $N - m$  cells so as to produce the same adjusted threshold intervals,  $u'_{m+1}, \dots, u'_N$ .

518 **How can this readjustment be done for the different mixtures?** If no spike was observed from the  
519 ON cells  $1, \dots, m$ , then the stimulus distribution to be coded by the remaining cells changes from the prior  $p(s)$   
520 to a new posterior distribution

$$p(s|\mathbf{0}) = p(\mathbf{0}|s) \frac{p(s)}{p(\mathbf{0})} = p(s) \frac{p(\mathbf{0}|s)}{Q_m}. \quad (30)$$

521 1. **If the remaining  $N - m$  cells are ON**, the region of reduced  $p(s)$  is entirely within the response region.  
522 Thus, the revised probability of having the stimulus in the response region is

$$\begin{aligned} u'_i &= \int_{\theta_i}^{+\infty} ds p(s|\mathbf{0}) = \frac{1}{Q_m} \int_{\theta_i}^{+\infty} ds p(\mathbf{0}|s) p(s) \\ &= \frac{1}{Q_m} \int_{1-u_i}^1 dx p(\mathbf{0}|x) = \frac{u_i - (1 - Q_m)}{Q_m}. \end{aligned} \quad (31)$$

524 where  $x = \int_0^s p(s') ds'$ .

525 **2. If the remaining  $N - m$  cells are OFF**, the region of reduced  $p(s)$  is entirely outside their response  
526 region. Thus, their revised probability is

$$u'_i = \int_0^{\theta_i} ds p(s|\mathbf{0}) = \frac{1}{Q_m} \int_0^{\theta_i} ds p(\mathbf{0}|s)p(s) = \frac{1}{Q_m} \int_0^{u_i} dx p(\mathbf{0}|x) = \frac{u_i}{Q_m}. \quad (32)$$

527 Therefore, the readjustment of the threshold intervals can be done differently for a homogeneous population  
528 when the remaining  $N - m$  cells are all ON, vs. a mixed population when the remaining  $N - m$  cells are all  
529 OFF. Since  $m$  can be anything between 1 and  $N$ , this covers all possible mixtures of ON and OFF cells, where

$$u'_i = \begin{cases} \frac{u_i - (1 - Q_m)}{Q_m}, & \text{homogeneous population with } N \text{ ON cells} \\ \frac{u_i}{Q_m}, & \text{mixed population with } m \text{ ON cells and } N - m \text{ OFF cells} \end{cases} \quad (33)$$

530 To find the maximal mutual information one needs to maximize Eq. 29 with respect to all the thresholds  
531 (i.e. threshold intervals). Since the homogeneous population of  $N$  ON cells and the mixed population of  $m$  ON  
532 cells and  $N - m$  OFF cells share the same  $m$  ON cells, maximizing the total mutual information  $I_N$  in Eq. 29 is  
533 equivalent to maximizing the additional mutual information  $I_{m+1, \dots, N|1, \dots, m}$  gained from the remaining  $N - m$   
534 cells with adjusted threshold intervals according to Eq. 33. This explains why the maximum information is  
535 identical between the purely homogeneous population with  $N$  ON cells and a mixed population where  $N - m$   
536 cells are OFF.

### 537 **Thresholds when optimizing the mutual information: a homogeneous population**

538 Next we derive the optimal thresholds for the homogeneous population with  $N$  ON cells, and later derive the  
539 thresholds of the  $N - m$  OFF cells after swapping.

540 If the thresholds are ordered in ascending order as assumed above, then  $u_1 < u_2 < \dots < u_N$  (S3 Figure).  
541 The mutual information of  $N$  ON cells can be written as follows. First, for a population of  $N = 1$  cells this has  
542 the form

$$I_1 = H(n_1) - H(n_1|s) = h(u_1(1 - q)) - u_1 h(1 - q), \quad (34)$$

543 where  $h$  is the entropy of a binary variable,  $h(u) = -u \log u - (1 - u) \log(1 - u)$ . For a population of  $N = 2$   
544 cells it has the form

$$I_2 = I_1 + P(n_1 = 0)I_{2|1} = g(u_1) + (1 - u_1(1 - q))g(u_2^{(1)}) \quad (35)$$

545 where we have defined  $g(u) = h(u(1 - q)) - uh(1 - q)$ . Here,  $u_2^{(1)}$  denotes the revised value of  $u_2$  following the  
546 observation of cell 1. In general, we use  $u_i^{(j)}$  to denote the revised value of  $u_i$  after the observation that cell  
547  $j < i$  did not spike. Therefore, for a population of  $N = 3$  cells it has the form

$$I_3 = g(u_1) + (1 - u_1(1 - q)) \left[ g(u_2^{(1)}) + (1 - u_2^{(1)}(1 - q)) g(u_3^{(2)}) \right]. \quad (36)$$

548 Generalizing this for  $N$  cells, the information is

$$I_N = g(u_1) + (1 - u_1(1 - q)) \left[ g(u_2^{(1)}) + \dots + (1 - u_{N-1}^{(N-2)}(1 - q)) g(u_N^{(N-1)}) \dots \right]. \quad (37)$$

549 The revised values of  $u_i^{(j)}$  for  $i = 2, \dots, N$  and  $j = 1, \dots, i - 1$  follow based on readjusting the thresholds depending  
550 on the observation of cells  $1, \dots, N - 1$  one at a time. For example, following the observation that cell 1 did not  
551 spike, the effective values of  $u_2, u_3, \dots, u_N$  are revised to

$$u_i^{(1)} = \frac{u_i - u_1(1 - q)}{1 - u_1(1 - q)}, \quad \text{for } i = 2, \dots, N. \quad (38)$$

552 Following the observation that cell 2 did not spike,  $u_3^{(1)}, u_4^{(1)} \dots u_N^{(1)}$  are further revised to

$$u_i^{(2)} = \frac{u_i^{(1)} - u_2^{(1)}(1 - q)}{1 - u_2^{(1)}(1 - q)}, \quad \text{for } i = 3, \dots, N. \quad (39)$$

553 This process continues, until the observation of cell  $N - 1$  with the final set of  $u_N^{(N-2)}$  being revised to

$$u_N^{(N-1)} = \frac{u_N^{(N-2)} - u_{N-1}^{(N-2)}(1-q)}{1 - u_{N-1}^{(N-2)}(1-q)}. \quad (40)$$

554 We maximize the information in Eq. 37 with respect to each  $u_i^{(j)}$ . We can do this sequentially: first maximize  
555  $I$  with respect to  $u_N^{(N-1)}$ , which results in maximizing  $g\left(u_N^{(N-1)}\right)$ . The maximum is obtained at

$$u_N^{(N-1)} = \frac{1}{(1-q) + q^{-q/(1-q)}} \quad (41)$$

556 yielding a maximal value of

$$\log\left(1 + (1-q)q^{q/(1-q)}\right). \quad (42)$$

557 Next, we maximize  $I$  with respect to  $u_{N-1}^{(N-2)}$ , which results in maximizing

558  $g\left(u_{N-1}^{(N-2)}\right) + \left(1 - u_{N-1}^{(N-2)}(1-q)\right) \log\left(1 + (1-q)q^{-q/(1-q)}\right)$ . The maximum is obtained at

$$u_{N-1}^{(N-2)} = \frac{1}{2(1-q) + q^{-q/(1-q)}} \quad (43)$$

559 yielding a maximal value of

$$\log\left(1 + 2(1-q)q^{q/(1-q)}\right). \quad (44)$$

560 Finally, we maximize  $I$  with respect to  $u_1$ , which results in maximizing

561  $g(u_1) + (1 - u_1(1-q)) \log\left(1 + (N-1)(1-q)q^{-q/(1-q)}\right)$ . The maximum is obtained at

$$u_1 = \frac{1}{N(1-q) + q^{-q/(1-q)}} \quad (45)$$

562 yielding a maximal value of the mutual information as in Eq. 1 in the Results section

$$I = \log\left(1 + N(1-q)q^{q/(1-q)}\right). \quad (46)$$

563 Based on these derivations we can obtain the sequence of

$$u_i = \frac{1 + (i-1)(1-q)}{N(1-q) + q^{-q/(1-q)}}, \quad \text{for } i = 1, \dots, N \quad (47)$$

564 where the difference between consecutive thresholds is given by Eq. 2

$$p = u_{i+1} - u_i = \frac{1-q}{N(1-q) + q^{-q/(1-q)}}, \quad \text{for } i = 1, \dots, N-1 \quad (48)$$

565 and the ‘edge’ threshold is Eq. 3

$$p_{\text{edge}} = u_1 = \frac{1}{N(1-q) + q^{-q/(1-q)}}. \quad (49)$$

## 566 **Thresholds when optimizing the mutual information: a mixed population**

567 With the Equal Coding Theorem we showed that the information for any ON/OFF mixture is the same (Eq. 46).

568 Next, we show how to derive the thresholds for a mixed population since we know that it will have the same  
569 mutual information as the homogeneous population. We do this by swapping  $N - m$  of the ON cells into OFF  
570 cells, knowing that the thresholds of the ON cells in the new mixed population remain the same, and derive the  
571 thresholds for the swapped OFF cells. This means that we need to derive a new set of  $u_{m+1}^{\text{mix}}, \dots, u_N^{\text{mix}}$  for the



572 OFF population, while keeping  $u_1, \dots, u_m$  the same for the ON population. To do this, recall that the thresholds  
573 for the OFF cells follow different update rules every time an ON cell is observed (see Eq. 33). In particular,

$$u_i^{(k)} = \frac{u_i^{(k-1)}}{1 - u_k^{(k-1)}(1 - q)}, \quad \text{for } i = m + 1, \dots, N. \quad (50)$$

574 Additionally, following the observation of OFF cell  $k$  (where  $k = m + 1, \dots, N - 1$ )

$$u_i^{(k)} = \frac{u_i^{(k-1)} - u_k^{(k-1)}(1 - q)}{1 - u_k^{(k-1)}(1 - q)}, \quad \text{for } i = k + 1, \dots, N. \quad (51)$$

575 Using these recursions and the values  $u_i^{(j)}$  for the ON cells derived previously (Eq. 41 – 45) one can recover the  
576 thresholds:

$$u_i = \frac{1 + (i - 1)(1 - q)}{N(1 - q) + q^{-q/(1-q)}}, \quad \text{for } i = 1, \dots, m \quad (52)$$

577 for the ON cells and

$$u_i^{\text{mix}} = \frac{1 + (m - i + 1)(1 - q)}{N(1 - q) + q^{-q/(1-q)}}, \quad \text{for } i = m + 1, \dots, N \quad (53)$$

578 for the OFF cells (in the mixed population case) where the difference between consecutive thresholds (except  
579 between the smallest ON and the largest OFF) is given by Eq. 48 and the ‘edge’ thresholds by Eq. 49. From  
580 here we can derive the ‘silent’ interval between the smallest ON and the largest OFF that separates the ON  
581 and OFF thresholds,  $p_0 = 1 - (N - 2)p - 2p_{\text{edge}}$ .

## 582 Mean firing rate when optimizing the mutual information

583 Given the optimal thresholds, the mean firing rate per neuron in a population with  $m$  ON cells is:

$$r = R \left[ p_{\text{edge}} + \frac{p}{2} \left( \frac{m^2 + (N - m)^2}{N} - 1 \right) \right] \quad (54)$$

584 In the large population regime, with  $\alpha = m/N$  the fraction of ON cells, the mean firing rate per neuron is

$$r(\alpha) = \frac{R}{2} (\alpha^2 + (1 - \alpha)^2), \quad (55)$$

585 however, in the high noise regime this becomes independent of  $\alpha$

$$r(\alpha) = \frac{R}{e}. \quad (56)$$

## 586 Optimal linear readout without noise

587 We present here the derivation for the homogeneous population with only ON cells when  $R \rightarrow \infty$ . The linear  
588 stimulus estimate of  $s$  (Eq. 4) can be written as:

$$y = \sum_{i=1}^N w_i \Theta(s - \theta_i) + w_0 \quad (57)$$

589 where  $w_i$  represent the decoding weights and the responses are given by the binary Heaviside functions with  
590 thresholds  $\theta_i$ . Then the mean square error between the original and the estimated stimulus can be written as:

$$E = \langle (y - s)^2 \rangle. \quad (58)$$

591 In the case of the homogeneous population, we can emulate the constant term  $w_0$  as the weight of an  
592 additional neuron with threshold  $\theta_0 = -\infty$ . Then

$$C_i = \langle \Theta(s - \theta_i) \rangle \quad \text{and} \quad U_i = \langle s \Theta(s - \theta_i) \rangle \quad (59)$$

593 so the error can be written as:

$$E = w^T C w - 2U^T w + \langle s^2 \rangle \quad (60)$$

594 where since  $\langle \Theta(s - \theta_i) \Theta(s - \theta_j) \rangle = \langle \Theta(s - \max(\theta_i, \theta_j)) \rangle$ , for  $i \geq j$ , we can write:  $C_{ij} = C_i$ . Optimizing with  
595 respect to the weight will gives us

$$w = C^{-1} U \quad (61)$$

596 which we can rewrite as (Eq. 6 in the Results section):

$$\sum_{j \leq i} w_j = \frac{\int_{\theta_i}^{\theta_{i+1}} ds s p(s)}{\int_{\theta_i}^{\theta_{i+1}} ds p(s)} = \langle s \rangle_i, \quad 0 \leq i \leq N \quad (62)$$

597 with  $\theta_{N+1} = \infty$  and (Eq. 5 in the Results section):

$$w_i = \langle s \rangle_i - \langle s \rangle_{i-1}, \quad i = 1, \dots, N \quad \text{and} \quad w_0 = \langle s \rangle_0. \quad (63)$$

598 Optimizing with respect to the thresholds:

$$\sum_{j \leq i} w_j = \theta_i + \frac{w_i}{2} \quad (64)$$

599 which gives

$$\theta_i - \theta_{i-1} = \frac{1}{2}(w_i - w_{i-1}) \quad (65)$$

600 and from this we can derive (Eq. 7 in the Results section):

$$\theta_i = \frac{1}{2}(\langle s \rangle_i + \langle s \rangle_{i-1}), \quad i = 1, \dots, N. \quad (66)$$

601 Optimizing with respect to the constant term yields:

$$w_0 = \frac{\int_{-\infty}^{\theta_1} ds s p(s)}{\int_{-\infty}^{\theta_1} ds p(s)}. \quad (67)$$

602 To solve these equations numerically, we implement an iterative procedure that rapidly converges to the optimal  
603 solution: starting from an ansatz for the thresholds, we compute  $\langle s \rangle_i$  and obtain  $w_i$ , which is used to derive the  
604 new set of thresholds.

605 In the case of the mixed population with ON and OFF cells, the optimal solution is one where the ON  
606 and OFF responses do not overlap; thus, there is no correlation between them. Therefore, we can treat each  
607 subpopulation separately, and in identical manner to the purely homogeneous case. The optimal weights and  
608 thresholds are identical to the homogeneous population population, with the exception of the constant term:

$$w_0^m = \frac{\int_{\theta_1^{\text{OFF}}}^{\theta_1^{\text{ON}}} ds s p(s)}{\int_{\theta_1^{\text{OFF}}}^{\theta_1^{\text{ON}}} ds p(s)} \quad (68)$$

609 where  $\theta_1^{\text{OFF}}$  denotes the largest OFF threshold and  $\theta_1^{\text{ON}}$  denotes the smallest ON threshold in the population.

## 610 Thresholds when optimizing the linear readout without noise

611 Now we consider the case of large  $N$  (for any mixture of ON and OFF cells) to derive the thresholds in the  
 612 asymptotic limit where the threshold intervals (differences between neighboring thresholds) are small. We use  
 613 a first order expansion of the stimulus distribution  $p(s)$  around each threshold  $\theta_j$  in the expressions for  $\langle s \rangle_j$ .

$$\langle s \rangle_j = \frac{\int_{\theta_j}^{\theta_{j+1}} ds s p(s)}{\int_{\theta_j}^{\theta_{j+1}} ds p(s)} = \theta_j + \frac{\int_{\theta_j}^{\theta_{j+1}} ds (s - \theta_j) p(s)}{\int_{\theta_j}^{\theta_{j+1}} ds p(s)} \approx \theta_j + \frac{\theta_{j+1} - \theta_j}{2} + \frac{p'(\theta_j)}{12p(\theta_j)} (\theta_{j+1} - \theta_j)^2 \quad (69)$$

614 and similarly,

$$\langle s \rangle_{j-1} \approx \theta_j + \frac{\theta_{j-1} - \theta_j}{2} + \frac{p'(\theta_j)}{12p(\theta_j)} (\theta_{j-1} - \theta_j)^2. \quad (70)$$

615 Combining Eq. 69 and Eq. 70 into Eq. 66, yields

$$\frac{2\theta_j - \theta_{j+1} - \theta_{j-1}}{4} = \frac{p'(\theta_j)}{24p(\theta_j)} [(\theta_{j+1} - \theta_j)^2 + (\theta_{j-1} - \theta_j)^2]. \quad (71)$$

616 Taking the continuous limit so that  $j$  maps onto  $x$  with  $j = 1$  corresponding to  $x = 0$ ,  $j = N$  corresponding to  
 617  $x = 1$ , and  $dx = 1/N$ , we can write

$$\theta_{j+1} - \theta_j = dx \theta'(x) \quad (72)$$

618

$$\theta_{j+1} - 2\theta_j + \theta_{j-1} = (dx)^2 \theta''(x) \quad (73)$$

619 turning Eq. 71 into:

$$\theta''(x) = g(x) (\theta'(x))^2. \quad (74)$$

620 We can further define:

$$g(x) = -\frac{dp(\theta(x))/d\theta}{3p(\theta(x))} = \frac{G(x)}{\theta'(x)} \quad \text{where } G(x) = -\frac{d}{3dx} \log p(\theta(x)). \quad (75)$$

621 Denoting  $y(x) = \theta'(x)$  gives the differential equation

$$y'(x) = G(x) y(x) \quad (76)$$

622 which has the solution

$$\log y = \int^x du G(u) + c \quad (77)$$

623 and consequently we obtain the differential equation

$$\theta'(x) = \frac{c}{p(\theta(x))^{1/3}} \quad (78)$$

624 where  $c$  is a constant. This can be inverted into

$$x(\theta) = c \int_{-\infty}^{\theta} p(\theta')^{1/3} d\theta' + c' \quad (79)$$

625 where  $x = i/N$  is the threshold index. We can determine the constants  $c$  and  $c'$  from the boundary conditions:

$$x(-\infty) = 0, \quad x(\infty) = 1 \quad (80)$$

626 such that (as Eq. 8 in the Results section),

$$x(\theta) = Z \int_{-\infty}^{\theta} p(\theta')^{1/3} d\theta', \quad Z^{-1} = \int_{-\infty}^{\infty} p(\theta')^{1/3} d\theta'. \quad (81)$$

627 Inverting this relationship, we can obtain the threshold distribution  $\theta(x)$  as a function of the index  $x = i/N$ .  
 628 An expression for the optimal thresholds for the Laplace distribution:  $p(s) = 1/2e^{-|s|}$  is provided in Eq. 9 in  
 629 the Results section.

## 630 Optimal linear readout with noise: homogeneous population

631 For convenience, we normalize the linear readout

$$y = \frac{1}{R} \sum_i w_i n_i + w_0. \quad (82)$$

632 The error can be written as before (Eq. 60) with different correlations

$$C_{ij} = \frac{1}{R} \langle \langle n_i \rangle_n \langle n_j \rangle_n \rangle + \frac{1}{R^2} \delta_{ij} \langle \langle n_i \rangle_n \rangle = \langle \Theta(s - \theta_i) \Theta(s - \theta_j) \rangle + \frac{1}{R} \delta_{ij} \langle \Theta(s - \theta_i) \rangle \quad (83)$$

633 If we define, as before:

$$C_i = \langle \Theta(s - \theta_i) \rangle \quad (84)$$

634 then for  $\langle \Theta(s - \theta_i) \Theta(s - \theta_j) \rangle = \langle \Theta(s - \max(\theta_i, \theta_j)) \rangle$ , and for  $i \geq j$ :

$$C_{ij} = C_i + \frac{1}{R} \delta_{ij} C_i \quad (85)$$

635 and

$$U_i = \langle s \Theta(s - \theta_i) \rangle - w_0 \langle \Theta(s - \theta_i) \rangle. \quad (86)$$

636 Optimizing with respect to the weights:

$$w = C^{-1} U \quad (87)$$

637 and

$$w_0 = \langle s \rangle - \sum_{i=1}^N w_i \langle \Theta(s - \theta_i) \rangle. \quad (88)$$

638 Optimizing with respect to the thresholds:

$$\theta_i = w_0 + \sum_{j \leq i} w_j - \frac{w_i}{2} (1 - R^{-1}), \quad i = 1, \dots, N. \quad (89)$$

639 To solve these equations numerically, we implement an iterative procedure that rapidly converges to the optimal  
640 solution: starting from an ansatz for the thresholds, we compute  $C$  and  $U$  and obtain  $w$  from Eq. 87, which is  
641 used to derive the new set of thresholds.

## 642 Thresholds when optimizing the linear readout with noise: homogeneous popula- 643 tion

644 We provide an expression for the optimal thresholds for the general Laplace distribution:

$$p(s) = \begin{cases} A_+ e^{-s/\tau_+}, & s \geq 0, \\ A_- e^{s/\tau_-}, & s < 0. \end{cases} \quad (90)$$

645 The symmetric Laplace distribution is one example,  $p(s) = 1/2 e^{-|s|}$ , with  $A_+ = A_- = 1/2$  and  $\tau_+ = \tau_- = 1$ . In  
646 the limit of large population size  $N$ , we again derive the thresholds in the asymptotic limit where the threshold  
647 intervals are small. Assuming  $\theta_1 < 0$ ,

$$x(\theta) = \frac{1}{\int_{\theta_1}^0 du \sqrt{1 - A_- \tau_- e^{u/\tau_-}} + 2\tau_+ \sqrt{A_+ \tau_+}} \begin{cases} \int_{\theta_1}^{\theta} du \sqrt{1 - A_- \tau_- e^{u/\tau_-}}, & \theta \leq 0 \\ \int_{\theta_1}^0 du \sqrt{1 - A_- \tau_- e^{u/\tau_-}} + 2\tau_+ \sqrt{A_+ \tau_+} (1 - e^{-\theta/2\tau_+}), & \theta > 0 \end{cases} \quad (91)$$

648 and assuming  $|\theta_1|$  is large so that  $\int_{\theta_1}^{\theta} du \sqrt{1 - A_- \tau_- e^{u/\tau_-}} \approx \theta - \theta_1$ , we can approximate

$$x(\theta) \approx \frac{1}{-\theta_1 + \tau_+ \sqrt{A_+ \tau_+}} \begin{cases} \theta - \theta_1, & \theta \leq 0 \\ -\theta_1 + 2\tau_+ \sqrt{A_+ \tau_+} (1 - e^{-\theta/2\tau_+}), & \theta > 0 \end{cases} \quad (92)$$

649 inverting this relationship, the optimal thresholds are:

$$\theta(x) \approx \begin{cases} \theta_1 + (-\theta_1 + 2\tau_+ \sqrt{A_+ \tau_+})x, & 0 \leq x \leq \frac{1}{1 - 2\tau_+ \sqrt{A_+ \tau_+}/\theta_1}, \\ -2\tau_+ \log \left[ \left( 1 - \frac{\theta_1}{2\tau_+ \sqrt{A_+ \tau_+}} \right) (1 - x) \right], & \frac{1}{1 - 2\tau_+ \sqrt{A_+ \tau_+}/\theta_1} \leq x \leq 1. \end{cases} \quad (93)$$

650 To fully determine the optimal thresholds, this requires knowledge of the first threshold,  $\theta_1$ . In the asymptotic  
651 limit, where the thresholds  $\theta_i$  are close to each other, again expanding  $p(s)$  around each threshold, we derive

$$\theta_1 \approx \tau_- \log \left( \frac{\log(RN A_- \tau_-)}{RN A_- \tau_-^2} \right). \quad (94)$$

## 652 Optimal linear readout with noise: mixed ON-OFF population

653 So far we have not explicitly treated the ON and OFF populations separately, because both when maximizing  
654 the mutual information for all noise levels, and minimizing the MSE in the limit of no noise, the performance  
655 and optimal thresholds were the same for all populations independent of the ON/OFF mixture. Now, we must  
656 treat the two populations separately.

657 Assume we have  $m$  ON cells and  $N - m$  OFF cells. We order the thresholds in the following manner (since  
658 non-overlapping ON and OFF cells is the optimal solution),

$$\theta_{N-m}^{\text{OFF}} \leq \theta_{N-m-1}^{\text{OFF}} \leq \dots \leq \theta_1^{\text{OFF}} \leq \theta_1^{\text{ON}} \leq \theta_2^{\text{ON}} \leq \dots \leq \theta_{m-1}^{\text{ON}} \leq \theta_m^{\text{ON}} \quad (95)$$

659 so that we can proceed in the same manner for each subpopulation as for the homogeneous population. The  
660 readout can be written as

$$y = \frac{1}{R} \sum_{i=1}^{N-m} w_i^{\text{OFF}} n_i^{\text{OFF}} + \frac{1}{R} \sum_{i=1}^m w_i^{\text{ON}} n_i^{\text{ON}} + w_0. \quad (96)$$

661 The error then is (assuming the optimal ON and OFF thresholds do not overlap – so that the ON-OFF cross-  
662 correlation is zero):

$$E = \langle (y - s)^2 \rangle = (w^{\text{ON}})^T C^{\text{ON}} w^{\text{ON}} + (w^{\text{OFF}})^T C^{\text{OFF}} w^{\text{OFF}} - 2(w^{\text{ON}})^T U^{\text{ON}} - 2(w^{\text{OFF}})^T U^{\text{OFF}} + \langle (s - w_0)^2 \rangle \quad (97)$$

$$663 \quad C_{ij}^{\text{ON}} = C_i^{\text{ON}} \quad \text{and} \quad C_{ij}^{\text{OFF}} = C_i^{\text{OFF}} \quad \text{for } i \geq j, \quad (98)$$

664 and

$$C_i^{\text{ON}} = \langle \Theta(s - \theta_i^{\text{ON}}) \rangle + \frac{1}{R} \delta_{ij} \langle \Theta(s - \theta_i^{\text{ON}}) \rangle \quad (99)$$

$$665 \quad C_i^{\text{OFF}} = \langle \Theta(\theta_i^{\text{OFF}} - s) \rangle + \frac{1}{R} \delta_{ij} \langle \Theta(\theta_i^{\text{OFF}} - s) \rangle, \quad (100)$$

$$666 \quad U_i^{\text{ON}} = \langle s \Theta(s - \theta_i^{\text{ON}}) \rangle - w_0 \langle \Theta(s - \theta_i^{\text{ON}}) \rangle \quad (101)$$

$$667 \quad U_i^{\text{OFF}} = \langle s \Theta(\theta_i^{\text{OFF}} - s) \rangle - w_0 \langle \Theta(\theta_i^{\text{OFF}} - s) \rangle \quad (102)$$

668 Optimizing with respect to the weights we get very similar expressions for each subpopulation (ON and OFF)  
669 as for the homogeneous population:

$$w^{\text{ON}} = (C^{\text{ON}})^{-1} U^{\text{ON}} \quad \text{and} \quad w^{\text{OFF}} = (C^{\text{OFF}})^{-1} U^{\text{OFF}} \quad (103)$$

670 and optimizing the thresholds:

$$\sum_{j \leq i} w_j^{\text{ON}} = \theta_i^{\text{ON}} - w_0 + \frac{w_i^{\text{ON}}}{2}(1 - R^{-1}), \quad i = 1, \dots, m \quad (104)$$

671 for the ON cells, and similarly for the OFF:

$$\sum_{j \leq i} w_j^{\text{OFF}} = \theta_i^{\text{OFF}} - w_0 + \frac{w_i^{\text{OFF}}}{2}(1 - R^{-1}), \quad i = 1, \dots, N - m. \quad (105)$$

672 The difference from the homogeneous population is in the constant term:

$$w_0^m = \langle s \rangle - \sum_{i=1}^m w_i^{\text{ON}} C_i^{\text{ON}} - \sum_{j=1}^{N-m} w_j^{\text{OFF}} C_j^{\text{OFF}}. \quad (106)$$

### 673 Thresholds when optimizing the linear readout with noise: mixed ON-OFF popu- 674 lation

675 We proceed in a similar fashion as with the homogeneous population to obtain the approximation in the case  
676 of large  $N$ : Let  $f^{\text{ON}} = m/N$  be the fraction of ON cells and  $f^{\text{OFF}} = (N - m)/N$  be the fraction of OFF cells  
677 in the population. We remap the thresholds, so that in the continuum limit  $\theta_{N-m}^{\text{OFF}} \leq \theta_{N-m-1}^{\text{OFF}} \leq \dots \leq \theta_1^{\text{OFF}}$   
678 becomes  $\theta^{\text{OFF}}(x^{\text{OFF}})$  and  $\theta_1^{\text{ON}} \leq \theta_2^{\text{ON}} \leq \dots \leq \theta_{m-1}^{\text{ON}} \leq \theta_m^{\text{ON}}$  becomes  $\theta^{\text{ON}}(x^{\text{ON}})$ . Thus, the threshold index  
679  $x = i/N \in [0, 1]$  for the homogeneous population becomes  $x^{\text{ON}} = i/m \in [0, f^{\text{ON}}]$  and  $i = 1, 2, \dots, m$  being the  
680 indices of the ON cells, and  $x^{\text{OFF}} = i/(N - m) \in [0, f^{\text{OFF}}]$  and  $i = 1, 2, \dots, N - m$  being the indices of the OFF  
681 cells. Figure 8 illustrates the mapping.

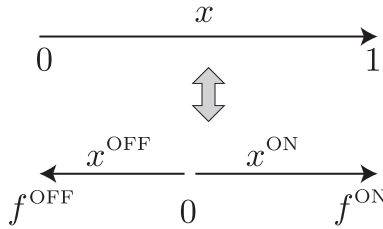

**Figure 8.** The mapping of the threshold indices from the homogeneous population with only ON cells to the mixed population with ON and OFF cells.

682 We provide an expression for the optimal thresholds for the general Laplace distribution (Eq. 90), and for a  
683 population that is unbalanced and has more ON cells,  $f^{\text{ON}} > f^{\text{OFF}}$ . If  $\theta_1^{\text{OFF}} \leq \theta_1^{\text{ON}} \leq 0$ , for the ON thresholds  
684 and weights the solution is similar to the case of the homogeneous population, i.e.

$$x^{\text{ON}}(\theta^{\text{ON}}) = \frac{f^{\text{ON}}}{\int_{\theta_1^{\text{ON}}}^0 du \sqrt{1 - A_- \tau_- e^{u/\tau_-} + 2\tau_+ \sqrt{A_+ \tau_+}} \int_{\theta_1^{\text{ON}}}^{\theta^{\text{ON}}} du \sqrt{1 - A_- \tau_- e^{u/\tau_-}}}, \quad \theta^{\text{ON}} \leq 0 \quad (107)$$

685 and

$$x^{\text{ON}}(\theta^{\text{ON}}) = f^{\text{ON}} \left[ 1 - \frac{2\tau_+ \sqrt{A_+ \tau_+} e^{-\theta^{\text{ON}}/2\tau_+}}{\int_{\theta_1^{\text{ON}}}^0 du \sqrt{1 - A_- \tau_- e^{u/\tau_-} + 2\tau_+ \sqrt{A_+ \tau_+}}} \right], \quad \theta^{\text{ON}} > 0. \quad (108)$$

686 These expressions have to be inverted to obtain  $\theta^{\text{ON}}(x^{\text{ON}})$ , which has to be done numerically. We proceed very  
687 similarly for the OFF cells. Namely, if  $\theta_1^{\text{OFF}} < 0$  and assuming  $|\theta_{N-m}^{\text{OFF}}|$  is large

$$x^{\text{OFF}}(\theta^{\text{OFF}}) = f^{\text{OFF}} \left( 1 - e^{(\theta^{\text{OFF}} - \theta_1^{\text{OFF}})/2\tau_-} \right) \quad (109)$$



688 inverting this relationship is possible analytically

$$\theta^{\text{OFF}}(x^{\text{OFF}}) = \theta_1^{\text{OFF}} + 2\tau_- \log(1 - x/f^{\text{OFF}}). \quad (110)$$

689 To fully determine the optimal thresholds, this requires knowledge of the first ON and OFF thresholds,  $\theta_1^{\text{ON}}$   
690 and  $\theta_1^{\text{OFF}}$ .

691 When the population is mixed so that neither population dominates, the first ON and OFF thresholds are  
692 order 1. Assuming that they are close in stimulus space, so that  $\theta_1^{\text{ON}} - \theta_1^{\text{OFF}} \ll 1$ , we can use the equations  
693 from optimizing the thresholds and weights to obtain the following equation which can be solved for  $\phi = \theta_1^{\text{OFF}}$ :

$$X(\phi) = \frac{2\tau_- \sqrt{1 - A - \tau_- e^{-\phi/\tau_-}}}{\int_{\theta_1^{\text{ON}}}^0 du \sqrt{1 - A - \tau_- e^{u/\tau_-}} + 2\tau_+ \sqrt{A + \tau_+}} \left( \frac{1}{A - \tau_-} e^{\phi/\tau_-} - 1 \right) \quad (111)$$

694 For the symmetric Laplace distribution with  $A_+ = A_- = 1/2$  and  $\tau_+ = \tau_- = 1$ , the equation to solve for  $\phi$   
695 reduces to (Fig. 9):

$$X(\phi) = \frac{2\sqrt{1 - \frac{1}{2}e^{-\phi}}}{\sqrt{2} + \int_{-\phi}^0 du \sqrt{1 - \frac{1}{2}e^u}} (2e^{\phi} - 1). \quad (112)$$

696 As shown in Figure 9, when there is an equal number of ON and OFF cells,  $X = 1$  and  $\theta_1^{\text{ON}} \approx \theta_1^{\text{OFF}} \approx 0$ . If there  
697 are 20% OFF cells and 80% ON cells in the population, then  $X = (1/5)/(4/5) = 1/4$ , and the first thresholds  
698 of each subpopulation are  $\theta_1^{\text{ON}} \approx \theta_1^{\text{OFF}} = -0.79$ . In the Results section we also considered asymmetric stimulus  
699 distributions where we varied the negative-to-positive bias  $\tau_-/\tau_+$  and derived the solutions in a similar manner  
700 (Fig. 5).

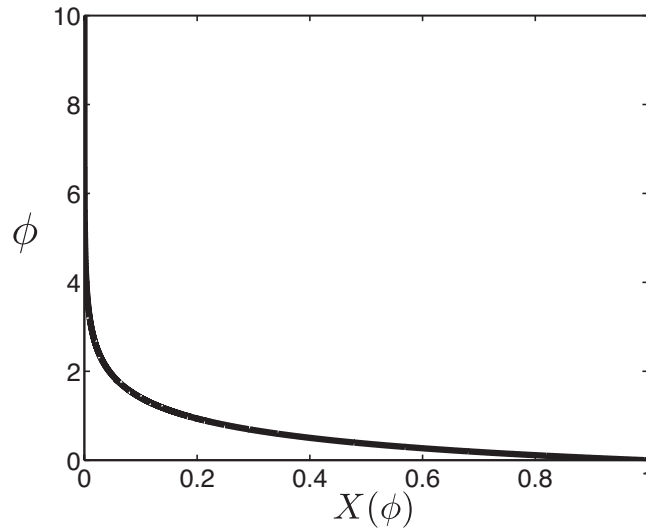

**Figure 9.** Determining the first thresholds for a mixed population of ON and OFF cells,  $\phi = |\theta_1^{\text{ON}}| \approx |\theta_1^{\text{OFF}}|$  as a function of  $X = f^{\text{OFF}}/f^{\text{ON}}$ . For a symmetric Laplace distribution  $p(s) = 1/2e^{-|s|}$ .

## 701 Deriving the stimulus distribution from measured ORN thresholds

702 From the study of Si and colleagues we extracted the distribution of measured thresholds (referred to as  $EC_{50}$   
703 values) [37]. The cumulative distribution of the inverse of thresholds is

$$P_{\theta} \left( X > \frac{1}{\theta} \right) \propto \left( \frac{1}{\theta} \right)^{-\lambda} \quad (113)$$

704 where  $\lambda = 0.42$  (Fig. 6B). This enables us to derive the probability density function of the inverse of thresholds  
 705 (Fig. 6C)

$$p_{\theta} \left( \frac{1}{\theta} \right) \propto \left( \frac{1}{\theta} \right)^{-\lambda-1}. \quad (114)$$

706 This distribution has a cut-off of  $\theta_c = 4.22 \cdot 10^4$  as reported in [37]. From this, we can derive the distribution  
 707 of measured thresholds

$$p_{\theta}(\theta) = \frac{1}{\theta^2} p \left( \frac{1}{\theta} \right) \quad \text{such that} \quad p_{\theta}(\theta) \propto \theta^{-\lambda+1}. \quad (115)$$

708 Next, we assume that these measured thresholds implement an optimal code first under the infomax criterion.  
 709 Now, using the equation for the cumulative distribution of optimal thresholds in the large population limit,  
 710  $x(\theta) = \int_{-\infty}^{\theta} p_c(z) dz$ , we can derive the stimulus distribution of odorant concentrations,  $p_c$ ,

$$p_c(C) \propto C^{-\lambda+1} = C^{-0.58}. \quad (116)$$

711 However, if we assume that these measured thresholds implement an optimal code under the criterion of minimiz-  
 712 ing the mean squared error of the optimal linear decoder,  $x(\theta) = \int_{-\infty}^{\theta} p_c^{1/3}(z) dz$ , then the stimulus distribution  
 713 of odorant concentrations,  $p_c$ , is

$$p_c(C) \propto C^{3(-\lambda+1)} = C^{-1.74}. \quad (117)$$

714 These are both shown in Fig. 6D.

## 715 Supporting information

716 **S1 Figure. Binary neurons with spontaneous firing rate and Poisson noise.** A framework with  
 717 binary neurons that have two firing rate levels,  $r$  if the stimulus is smaller (bigger) than a threshold, and  $R$  if  
 718 the stimulus is bigger (smaller) than a threshold for ON (OFF) cells. We compare two systems, left: one ON  
 719 (red) and one OFF (blue) cells, and right, two ON cells, where the information is maximized by optimizing the  
 720 cells thresholds.

721 **S2 Figure. Sigmoidal neurons with sub-Poisson experimentally measured noise.** Two sigmoidal  
 722 nonlinearities for an ON cell (red) and an OFF cell (blue), describing the firing rate as a function of stimulus  
 723 with the maximum expected spike count  $R$ , the gain  $\beta$ , and the threshold  $\theta$ . The shaded curve denotes the  
 724 Laplace stimulus probability distribution.

725 **S1 Text. Mutual Information for a system with two cells.** The mutual information for different noise  
 726 models.

727 **S1 Table. Conditional probability matrix.** Conditional probability matrix  $p(k_1, k_2|s)$  for a mixed ON-  
 728 OFF system.

729 **S2 Table. Conditional probability matrix.** Conditional probability matrix  $p(k_1, k_2|s)$  for a homogeneous  
 730 ON-ON system.

731 **S3 Table. Mutual information for a two-cell system.** Mutual information for a two-cell system with  
 732 spontaneous firing rate and Poisson noise.

733 **S4 Table. Mutual information for a two-cell system.** Mutual information for a two-cell system with  
 734 empirically measured sub-Poisson noise from salamander retinal ganglion cells.

## 735 Acknowledgments

736 All authors were supported by the NIH, the Gatsby Charitable Foundation and the Swartz Foundation. JG  
737 was supported by the Max Planck Society and a Burroughs-Wellcome Career Award at the Scientific Interface.  
738 JG thanks Shuai Shao for careful reading of the analytical calculations.

## References

1. Barlow HB. Possible principles underlying the transformations of sensory messages. In: Sensory Communication. MIT Press; 1961. p. 217–234.
2. Atick JJ, Redlich AN. Towards a theory of early visual processing. *Neural Comput.* 1990;2:308–320.
3. Atick JJ, Redlich AN. What does the retina know about natural scenes? *Neural Comput.* 1992;4:196–210.
4. Laughlin SA. Simple coding procedure enhances a neuron’s information capacity. *Z Naturforsch C.* 1981;36:910–912.
5. van Hateren JH. Theoretical predictions of spatiotemporal receptive fields of fly LMCs, and experimental validation. *J Comp Physiol A.* 1992;171:157–170.
6. Smith EC, Lewicki MS. Efficient auditory coding. *Nature.* 2006;439:978–982.
7. Simoncelli EP, Olshausen BA. Natural image statistics and neural representation. *Annu Rev Neurosci.* 2001;24:1193–1216.
8. Kuffler SW. Discharge patterns and functional organization of mammalian retina. *J Neurophysiol.* 1953;16:37–68.
9. Joesch M, Schnell B, Raghu SV, Reiff DF, Borst A. ON and OFF pathways in *Drosophila* motion vision. *Nature.* 2010;468:300–304.
10. Gallio M, Ofstad TA, Macpherson LJ, Wang JW, Zuker CS. The coding of temperature in the *Drosophila* brain. *Cell.* 2011;144:614–624.
11. Chalasani SH, Chronis N, Tsunozaki M, Gray JM, Ramot D, Goodman MB, et al. Dissecting a circuit for olfactory behaviour in *Caenorhabditis elegans*. *Nature.* 2007;450:63–70.
12. Tsunozaki M, Bautista DM. Mammalian somatosensory mechanotransduction. *Curr Opin Neurobiol.* 2009;19:362–369.
13. Bell CC. Mormyromast electroreceptor organs and their afferent fibers in mormyrid fish. III. Physiological differences between two morphological types of fibers. *J Neurophysiol.* 1990;63:319–332.
14. Kastner DB, Baccus SA. Coordinated dynamic encoding in the retina using opposing forms of plasticity. *Nat Neurosci.* 2011;14:1317–1322.
15. Hodson-Tole EF, Wakeling JM. Motor unit recruitment for dynamic tasks: current understanding and future directions. *J Comp Physiol B.* 2009;179:57–66.
16. Schiller PH. The ON and OFF channels of the visual system. *Trends Neurosci.* 1992;15:86–92.
17. Gjorgjieva J, Sompolinsky H, Meister M. Benefits of pathway splitting in sensory coding. *J Neurosci.* 2014;34:12127–12144.
18. Kastner DB, Baccus SA, Sharpee TO. Critical and maximally informative encoding between neural populations in the retina. *Proc Natl Acad Sci USA.* 2015;112:2533–2538.

19. Brinkman BAW, Weber AI, Rieke F, Shea-Brown E. How do efficient coding strategies depend on origins of noise in neural circuits. *PLoS Comp Biol.* 2016;12:e1005150.
20. Ratliff CP, Borghuis BG, Kao YH, Sterling P, Balasubramanian V. Retina is structured to process an excess of darkness in natural scenes. *Proc Natl Sci USA.* 2010;107:17368–17373.
21. Doi E, J LG, Field GD, Shlens J, Sher A, Greschner M, et al. Efficient coding of spatial information in the primate retina. *J Neurosci.* 2012;32:16256–16264.
22. Seung HS, Sompolinsky H. Simple models for reading neuronal population codes. *Proc Natl Acad Sci USA.* 1993;90:10749–10753.
23. Bell AJ, Sejnowski TJ. The “Independent Components” of natural scenes are edge filters. *Vision Res.* 1997;37:3327–3338.
24. Brunel N, Nadal JP. Mutual information, Fisher information, and population coding. *Neural Comput.* 1998;10:1731–1757.
25. Wang Z, Stocker AA, Lee DD. Efficient neural codes that minimize  $L_p$  reconstruction error. *Neural Comput.* 2016;28:2656–2686.
26. Warland DK, Reinagel P, Meister M. Decoding visual information from a population of retinal ganglion cells. *J Neurophysiol.* 1997;78:2336–2350.
27. Bethge M, Rotermund D, Pawelzik K. Optimal neural rate coding leads to bimodal firing rate distributions. *Network: Comput Neur Syst.* 2003;14:303–319.
28. Pitkow X, Meister M. Decorrelation and efficient coding by retinal ganglion cells. *Nat Neurosci.* 2012;15:628–635.
29. Rieke F, Warland D, de Ruyter van Steveninck RR, Bialek W. *Spikes: Exploring the neural code.* Cambridge, MA: MIT Press; 1997.
30. Bialek W, de Ruyter van Steveninck RR, Warland D. Reading a neural code. *Science.* 1991;252:1854–1857.
31. Lumpkin EA, Caterina MJ. Mechanisms of sensory transduction in the skin. *Nature.* 2007;445:858–865.
32. Dhaka A, Viswanath V, Patapoutian A. TRP ion channels and temperature sensation. *Annu Rev Neurosci.* 2006;29:135–161.
33. Romo R, Brody CD, Hernández A, Lemus L. Neuronal correlates of parametric working memory in the prefrontal cortex. *Nature.* 1998;399:470–473.
34. Salinas E, Hernández A, Zainos A, Romo R. Periodicity and firing rate as candidate neural codes for the frequency of vibrotactile stimuli. *J Neurosci.* 2000;20:5503–5515.
35. Hallem EA, Carlson JR. Coding of odors by a receptor repertoire. *Cell.* 2006;125:143–160.
36. Stevens CF. A statistical property of fly odor responses is conserved across odors. *Proc Natl Acad Sci.* 2016;113:6737–6742.
37. Si G, Kanwal JK, Hu Y, Tabone CJ, Baron J, Berck M, et al. Invariances in a combinatorial olfactory receptor code. *Neuron.* 2019;in press:<https://doi.org/10.1016/j.neuron.2018.12.030>.
38. Uzzell VJ, Chichilnisky EJ. Precision of spike trains in primate retinal ganglion cells. *J Neurophysiol.* 2004;92:780–789.
39. Sharpee TO. Optimizing neural information capacity through discretization. *Neuron.* 2017;94:954–960.

40. Balasubramanian V, Kimber D, II MJB. Metabolically efficient information processing. *Neural Computation*. 2001;13:799–815.
41. Stein RB. The information capacity of nerve cells using a frequency code. *Biophys J*. 1967;7:797–826.
42. Shamai S. Capacity of a pulse amplitude modulated direct detection photon channel. *IEE Proc Commun Speech Vis*. 1990;137:424–430.
43. Nikitin AP, Stocks NG, McDonnell MD. Neural population coding is optimized by discrete tuning curves. *Phys Rev Lett*. 2009;103:138101.
44. Sachs MB, Abbas PJ. Rate versus level functions for auditory-nerve fibers in cats: tone-burst stimuli. *J Acoust Soc Am*. 1974;56:1835–1847.
45. Lewen GD, Bialek W, de Ruyter van Steveninck RR. Neural coding of naturalistic motion stimuli. *Network: Comput Neural Syst*. 2001;12:317–329.
46. Strong SP, de Ruyter van Steveninck RR, Bialek W, Koberle R. On the application of information theory to neural spike trains. *Pac Symp Biocomput*. 1998;1998:621–632.
47. Nadal JP, Parga N. Nonlinear neurons in the low noise limit: a factorial code maximizes information transfer. *Network Comput Neural Syst*. 1994;5:565–581.
48. Puchalla JL, Schneidman E, Harris RA, Berry MJ. Redundancy in the population code of the retina. *Neuron*. 2005;46:493–504.
49. Tkacik G, Prentice JS, Balasubramanian V, Schneidman E. Optimal population coding by noisy spiking neurons. *Proc Natl Acad Sci USA*. 2010;107:14419–14424.
50. Silies M, Gohl DM, Fisher YE, Freifeld L, Clark DA, Clandinin TR. Modular use of peripheral input channels tunes motion-detecting circuitry. *Neuron*. 2013;79:111–127.
51. Bhattacharya MRC, Bautista DM, Wu K, Haerberle H, Lumpkin EA, , et al. Radial stretch reveals distinct populations of mechanosensitive mammalian somatosensory neurons. *Proc Natl Acad USA*. 2008;105:20015–20020.
52. Dayan P, Abbott LF. *Theoretical neuroscience: computational and mathematical modelling of neural systems*. Cambridge, Massachusetts, London, England: The MIT Press; 2001.
53. Panter PF, Dite W. Quantizing distortion in pulse-count modulation with nonuniform spacing of levels. *Proc IRE*. 1951;39:44–48.
54. Gray RM, Neuhoff DL. Quantization. *IEEE Trans Inf Theory*. 1998;44:2325–2383.
55. Field DJ. What is the goal of sensory coding? *Neural Comput*. 1994;6:559–601.
56. Ruderman DL. The statistics of natural images. *Network: Comput Neural Syst*. 1994;5:517–548.
57. Dong DW, Atick JJ. Statistics of natural time-varying images. *Network: Comput Neural Syst*. 1995;6:345–358.
58. van Hateren JH. Processing of natural time series of intensities by the visual system of the blowfly. *Vision Res*. 1997;37:3407–3416.
59. Tadmor Y, Tolhurst DJ. Calculating the contrasts that retinal ganglion cells and LGN neurones encounter in natural scenes. *Vision Res*. 2000;40:3145–3157.
60. Singh NC, Theunissen FE. Modulation spectra of natural sounds and ethological theories of auditory processing. *J Acoust Soc Am*. 2003;114:3394–3411.

61. Geisler WS. Visual perception and the statistical properties of natural scenes. *Annu Rev Psychol.* 2008;59:167–192.
62. Catrakis HJ, Dimotakis PE. Scale distributions and fractal dimensions in turbulence. *Phys Rev Lett.* 1996;77:3795.
63. Dekker T, Ibba I, Siju KP, Stensmyr MC, Hansson BS. Olfactory shifts parallel superspecialism for toxic fruit in *Drosophila melanogaster*, sibling, *D. sechellia*. *Curr Biol.* 2006;16:101–109.
64. Linz J, Baschwitz A, Strutz A, Dweck HKM, Sachse S, Hansson BS, et al. Host plant-driven sensory specialization in *Drosophila erecta*. *Proc Royal Soc B.* 2013;280:20130626.
65. Sanes JR, Masland RH. The types of retinal ganglion cells: current status and implications for neuronal classification. *Annu Rev Neurosci.* 2015;38:221–246.
66. Baden T, Berens P, Franke K, Rosón R, Bethge M, Euler T. The functional diversity of retinal ganglion cells in the mouse. *Nature.* 2016;529:345–350.
67. Tishby N, Pereira F, Bialek W. The information bottleneck method. In: *Proceedings 37th Allerton Conference on Communication, Control, and Computing*; 1999. p. 368–377.
68. Palmer SE, Marre O, Berry MJ, Bialek W. Predictive information in a sensory population. *Proc Natl Acad Sci USA.* 2015;112:6908–6913.
69. Mlynarski W, Hermundstad A. Adaptive coding for dynamic sensory inference. *BioRxiv.* 2018;doi: <http://dx.doi.org/10.1101/189506>.
70. Oswald MJ, Tantirigama MLS, Sonntag I, Hughes SM, Empson RM. Diversity of layer 5 projection neurons in the mouse motor cortex. *Front Cell Neurosci.* 2013;7:174:doi: 10.3389/fncel.2013.0017.
71. Risner JR, Holt JR. Heterogeneous potassium conductances contribute to the diverse firing properties of postnatal mouse vestibular ganglion neurons. *J Neurophysiol.* 2006;96:2364–2376.
72. Tan J, Savigner A, Ma M, Luo M. Odor information processing by the olfactory bulb analyzed in gene-targeted mice. *Neuron.* 2010; p. 912–926.
73. Tichy H, Hinterwirth A, Gingl E. Olfactory receptors on the cockroach antenna signal odour ON and odour OFF by excitation. *Eur J Neurosci.* 2005;22:3147–3160.
74. Park IM, Pillow J. Bayesian Efficient Coding. *BioRxiv.* 2017;doi: <http://dx.doi.org/10.1101/178418>.
75. Attneave F. Some informational aspects of visual perception. *Psychol Rev.* 1954;61:183–193.
76. Atick JJ, Redlich AN. Convergent Algorithm for Sensory Receptive Field Development. *Neural Comput.* 1993;5:45–60.
77. Roska B, Meister M. The Retina Dissects the Visual Scene into Distinct Features. In: *The New Visual Neurosciences*. Cambridge, MA: The MIT Press; 2014. p. 163–182.
78. Pillow JW, Shlens J, Paninski L, Sher A, Litke AM, Chichilnisky EJ, et al. Spatio-temporal correlations and visual signalling in a complete neuronal population. *Nature.* 2008;454:995–999.
79. Nadal JP, Brunel N. Nonlinear feedforward networks with stochastic output: infomax implies redundancy reduction. *Network Comput Neural Syst.* 1998; p. 207–217.
80. Tkacik G, Walczak AM, Bialek W. Optimizing information flow in small genetic networks. *Phys Rev E.* 2009;80:031920.

81. Ganguli D, Simoncelli EP. Efficient sensory encoding and Bayesian inference with heterogeneous neural populations. *Neural Computat.* 2014;26:2103–2134.
82. Karklin Y, Simoncelli EP. Efficient coding of natural images with a populations of noisy Linear-Nonlinear neurons. In: Shawe-Taylor J, Zemel RS, Bartlett P, Pereira F, Weinberger KQ, editors. *Adv Neural Inf Proc Syst 24*. Cambridge, MA: MIT Press; 2011. p. 999–1007.
83. Pouget A, Deneve S, Ducom JC, Latham PE. Narrow versus wide tuning curves: What's best for a population code? *Neural Comput.* 1999;11:85–90.
